1 **DEMOGRAPHY AND SELECTION SHAPE TRANSCRIPTOMIC DIVERGENCE IN**  
2 **FIELD CRICKETS**

3  
4  
5  
6  
7  
8  
9

10 **Thomas Blankers<sup>1,2,3</sup>, Sibelle T. Vilaça<sup>4,5</sup>, Isabelle Waurick<sup>2</sup>, David A. Gray<sup>6</sup>, R. Matthias Hennig<sup>1</sup>,**  
11 **Camila J. Mazzoni<sup>4,5</sup>, Frieder Mayer<sup>2,7</sup>, Emma L. Berdan<sup>2,8</sup>**

12 <sup>1</sup> *Behavioural Physiology, Department of Biology, Humboldt-Universität zu Berlin, Berlin, Germany, D-*  
13 *10115; Corresponding author: thomasblankers@gmail.com*

14 <sup>2</sup> *Museum für Naturkunde Berlin, Leibniz Institute for Evolution and Biodiversity Science, Berlin,*  
15 *Germany, D-10115*

16 <sup>3</sup> *Current Address: Department of Neurobiology and Behavior, Cornell University, Ithaca, NY, USA,*  
17 *14853*

18 <sup>4</sup> *Berlin Center for Genomics in Biodiversity Research (BeGenDiv), Berlin, Germany, D-14195*

19 <sup>5</sup> *Leibniz-Institut für Zoo- und Wildtierforschung (IZW), Berlin, Germany, D-10315*

20 <sup>6</sup> *Department of Biology, California State University Northridge, Northridge, CA, USA, 91330-8303*

21 <sup>7</sup> *Berlin-Brandenburg Institute of Advanced Biodiversity Research (BBIB), Berlin, Germany, D-14195*

22 <sup>8</sup> *Current Address: Department of Marine Sciences, University of Gothenburg, Gothenburg, Sweden, SE*  
23 *- 405 30*

24  
25  
26  
27  
28  
29  
30  
31

32 **ABSTRACT**

33 Gene flow, demography, and selection can result in similar patterns of genomic variation and  
34 disentangling their effects is key to understanding speciation. Here, we assess transcriptomic variation to  
35 unravel the evolutionary history of *Gryllus rubens* and *G. texensis*, cryptic field cricket species with highly  
36 divergent mating behavior. We infer their demographic history and screen their transcriptomes for  
37 footprints of selection in the context of the inferred demography. We find strong support for a long history  
38 of bidirectional gene flow, which ceased during the late Pleistocene, and a bottleneck in *G. rubens*  
39 consistent with a peripatric origin of this species. Importantly, comparing the observed  $F_{ST}$  distribution  
40 with distributions from coalescent simulations under various demographic scenarios indicates that gene  
41 flow (without selection) strongly shaped patterns of genetic divergence. Genetic divergence at  $F_{ST}$  outlier  
42 loci could thus falsely be attributed to selection when not accounting for demographic history. We  
43 uncovered a subset of loci with signatures of selection, many of which are candidates for controlling  
44 variation in mating behavior. Our results underscore the importance of gene flow and demography in  
45 overall levels of genetic divergence and highlight that simultaneously examining demography and  
46 selection facilitates a more complete understanding of genetic divergence during speciation.

47

48

49 **INTRODUCTION**

50 The study of speciation and the origins of earth's biodiversity are at the core of evolutionary biology. An  
51 important first step is understanding the mechanisms that drive genetic divergence between closely related  
52 groups of organisms. In the age of next-generation sequencing, our understanding of these mechanisms is  
53 rapidly advancing. However, a variety of processes such as gene flow, local variation in recombination  
54 and mutation rates, linked or background selection, and divergent selection often simultaneously influence  
55 genetic variation between diverging lineages and the different processes may leave similar signatures in  
56 the genome (Noor and Bennett 2009; Feder et al. 2012; Nachman and Payseur 2012; Cutter and Payseur  
57 2013; Seehausen et al. 2014; Burri et al. 2015). Therefore, to understand how populations diverge, how

58 reproductive isolation evolves, and how this affects the genome, it is essential that we examine both  
59 selective and neutral processes.

60 Recently, the role of gene flow in speciation has drawn renewed attention (Smadja and Butlin 2011; Feder  
61 et al. 2013; Sousa and Hey 2013; Servedio 2015; Ravinet et al. 2017) . It was once thought that  
62 reproductive barriers could only evolve in allopatry (Mayr 1963; Bolnick and Fitzpatrick 2007). However,  
63 this view has shifted due to accumulating evidence for varying rates of gene flow during early divergence  
64 (Bolnick and Fitzpatrick 2007; Nosil 2008; Bird et al. 2012). Although ‘true’ sympatric speciation is likely  
65 rare, there is nowadays a general acceptance that some amount of gene flow occurs during many  
66 speciation events, i.e. parapatric speciation (Coyne and Orr 2004; Smadja and Butlin 2011; Arnold 2015).  
67 Speciation with gene flow has attracted special attention because strong divergent selection in  
68 combination with high migration rates may lead to higher genomic divergence in the regions harboring  
69 loci important for reproductive isolation and local adaptation (Turner et al. 2005; Nosil et al. 2009; Cutter  
70 and Payseur 2013; Feder et al. 2013; Ravinet et al. 2017). However, variation in levels of divergence  
71 across the genome may also strongly depend on locally reduced intraspecific diversity due to demographic  
72 effects or variation in mutation and recombination rates (Nachman and Payseur 2012; Cruickshank and  
73 Hahn 2014; Burri et al. 2015). Additionally, the likelihood of detecting the effects of selection above  
74 background levels of genomic variation is highly dependent on the genetic architecture of the traits under  
75 selection (Jiggins and Martin 2017) and the strength of selection (Ortiz-Barrientos and James 2017). These  
76 caveats warrant caution in the interpretation of the results from genomic scans, especially without a  
77 detailed understanding of the behavioral ecology and evolutionary history of the study system (Ravinet et  
78 al. 2017).

79 Here, we assess the role of neutral demographic and selective mechanisms in driving genetic divergence  
80 between the transcriptomes of two sexually isolated field cricket species, *Gryllus rubens* and *G. texensis*.  
81 The species pair is widely distributed across the southern Gulf and Mid-Atlantic States in North America,  
82 with a broad sympatric region from eastern Texas through western Florida (Fig. 1). Males are  
83 morphologically cryptic (Gray et al. 2008) and there is no documented ecological divergence (Gray 2011).

84 However, females differ in the length of the ovipositor (Gray et al. 2001), which tentatively reflects  
85 ecological adaptation to different soil types (Bradford et al. 1993). There is strong premating isolation  
86 between the species through species-specific long-distance mate attraction songs (Walker 1998; Gray and  
87 Cade 2000; Blankers et al. 2015a), close-range courtship songs (Gray 2005; Izzo and Gray 2011), and  
88 potentially through cuticular hydrocarbons (CHCs, Gray 2005), which are known to be used in chemical  
89 mate signaling in congeneric as well as more distantly related field cricket species (Tregenza and Wedell  
90 1997; Thomas and Simmons 2010; Maroja et al. 2014). Reproductive isolation is maintained in the zone  
91 of overlap, but there is no evidence for reproductive character displacement, indicating that reinforcement  
92 is unlikely to affect divergence in these species (Higgins and Waugaman 2004; Izzo and Gray 2004).

93 Given their current distributions (Fig. 1), we hypothesize that interspecific gene flow has played a  
94 potentially dominant role in the evolutionary history of *G. texensis* and *G. rubens*. However, we expect  
95 contemporary gene flow to be unlikely because (1) the most distinctive phenotype in this system, the  
96 rhythm of the male song, is bimodally distributed among the species both in allopatry and in sympatry  
97 with no intermediates (i.e. F1 hybrids or backcrosses) collected (Walker 1998; Gray and Cade 2000;  
98 Higgins and Waugaman 2004; Izzo and Gray 2004; Blankers et al. 2015a), (2) there is no signature of  
99 reinforcement on female preferences as the strength of female preference for conspecific males does not  
100 vary between sympatry and allopatry (Gray and Cade 2000; Izzo and Gray 2004), and (3) lab-reared  
101 offspring of field inseminated females are always pure species (Walker 1998; Gray and Cade 2000;  
102 personal observations). A mitochondrial DNA study found evidence that suggests *G. rubens* has a  
103 peripatric origin from *G. texensis* (Gray et al. 2008) and we thus hypothesize that divergence between *G.*  
104 *texensis* and *G. rubens* is associated with a strong bottleneck for the latter but not the former species.

105 In addition to understanding the evolutionary historical context in which *G. texensis* and *G. rubens* have  
106 evolved, we also aim to elucidate the role selection played during divergence. The striking variation in  
107 sexual communication behavior in this system involves multiple signaling parameters and corresponding  
108 preferences, likely across multiple communication channels (i.e. acoustic and chemical). This implies a  
109 strong selective pressure on genes related to chemical and acoustic mating signals. Variation in song

110 depends on (i) the morphology and resonant properties of the wings, (ii) neural networks called central  
111 pattern generators that control rhythmic wing movement, and (iii) neuromuscular properties of the  
112 muscles that affect the temporal rhythm of the song (reviewed in Gerhardt and Huber 2002). Similarly,  
113 song recognition and preference in females are controlled by a complex network of neurons and likely  
114 depend on properties of ion channels, in particular potassium channels mediating inhibitory effects  
115 (Hennig et al. 2014; Schoneich et al. 2015; Göpfert and Hennig 2016).

116 Variation in song signals and preferences is thus expected to be manifested in changes in the properties of  
117 muscles, neuromuscular junctions, and channels mediating excitatory and inhibitory stimuli from within  
118 the nervous system. We predict that if selection on these traits has played an important role in establishing  
119 and maintaining reproductive isolation, loci showing putative footprints of selection can be tied to the  
120 biological processes associated with variation in secondary sexual characters in general, and properties of  
121 the nervous system that can be linked to song or song preference behavior in particular.

122

## 123 **MATERIALS & METHODS**

### 124 *Sample collection*

125 Animals were collected in the USA in Lancaster and Austin (TX; ca. 80 *G. texensis* females) and in Lake  
126 City and Ocala (FL; ca. 40 *G. rubens* females) in autumn 2013 (Fig. 1 black dots). Collected females,  
127 which are typically already inseminated in the field, were housed in containers in groups of up to 15  
128 individuals with gravel substrate, shelter, and water and food *ad libitum*. Each container also contained a  
129 cup with vermiculite for oviposition. During two weeks, eggs were collected and transferred to new  
130 containers; hatchlings were then reared to adulthood. We used laboratory-raised offspring of the field-  
131 caught females between one and three weeks after their final molt rather than field-caught specimens to  
132 standardize rearing conditions across all samples. All animals (males and females) were played back an  
133 artificial stimulus resembling the conspecific male song for 10 minutes prior to sacrificing the animal. The  
134 rationale here was that one of our primary objectives was to look at genetic divergence in relation to

135 mating behavior polymorphism. In case specific genes involved in female preference behavior were only  
136 expressed upon hearing a male song signal, this could potentially be overcome by a brief play back 30 –  
137 120 minutes prior to RNA preservation. Stimulus play back occurred for females and males to standardize  
138 the RNA sampling method across sexes. Within two hours of stimulus presentation, we sacrificed the  
139 cricket, removed the gut and then preserved the body in RNAlater following the manufacturer's  
140 instructions; samples were then stored at -80 °C until RNA isolation. A total of five males and five  
141 females were used from each of the two populations for each species (40 individuals in total; randomly  
142 sampled across containers when there were multiple containers for crickets from the same population).  
143 Total RNA extraction and directional, strand-specific Illumina library preparation were done as described  
144 in a recently published transcriptomic resource for *Gryllus rubens* (Berdan et al. 2016).

#### 145 *SNP calling*

146 Raw reads were processed using Flexbar (Dodt et al. 2012) to remove sequencing primers, adapters, and  
147 low quality bases on the 3' end of the individually barcoded reads. Samples were mapped to the *G. rubens*  
148 reference transcriptome (Berdan et al. 2016) using Bowtie2 (Langmead and Salzberg 2012) with default  
149 parameters but specifying read groups to mark reads as belonging to a specific individual. Duplicate reads  
150 were marked using 'picard' (<http://broadinstitute.github.io/picard>). The Genome Analysis Toolkit (GATK,  
151 DePristo *et al.* 2011; Van der Auwera *et al.* 2013) was used to call genotypes with the GATK-module  
152 'UnifiedGenotyper' (Van der Auwera et al. 2013). The variants were then filtered to only retain high  
153 quality SNPs based on the recommendations on the GATK website  
154 (<https://gatkforums.broadinstitute.org/gatk/discussion/comment/30641>, accessed on 05/05/2015) and as  
155 described in a previous study (Berdan et al. 2015). The minor allele frequency (MAF) cut-off was set at  
156 0.025 (a minimum of two copies of the allele).

157 Our sampling design was optimized to standardize the conditions under which we stored RNA samples,  
158 but potentially introduced a bias towards collecting related individuals. This may affect both demographic  
159 inference and the summary statistics used to identify selective sweeps. To correct for the potential cryptic  
160 relatedness, we used the PLINK methods-of-moments approach (Purcell et al. 2007) implemented in the

161 SNPrelate package (Zheng et al. 2012) in R (R Development Core Team 2016) to estimate kinship  
162 coefficients for all pairs based on the allele frequencies within each population sample. We excluded eight  
163 individuals that showed estimated kinship coefficients above 0.125 (half-sib level) with other individuals  
164 from their population, leaving 17 *G. texensis* and 15 *G. rubens* individuals for downstream analyses.

### 165 *The demographic history*

166 We first tested whether the contemporary populations show geographic genetic structure. We inspected  
167 allele frequency variation within and between species and populations using principal component analysis.  
168 We also ran STRUCTURE (Falush et al. 2003) using a single SNP locus per contig (8,835 randomly  
169 drawn SNPs). We used the admixture model with sampling location as prior information. We ran  
170 STRUCTURE with an MCMC chain length of 100,000 and with a burn-in length of 10,000 for K=1  
171 through K=5 (K=4 for the species-specific runs) with three repetitions for each K-value. Results were  
172 analyzed using STRUCTURE HARVESTER (Earl and vonHoldt 2012) using the log-likelihood to  
173 compare K=1 versus all other values for K and the delta K method (Evanno et al. 2005) to compare K=2  
174 versus all higher values of K.

175 To investigate the demographic history of *G. rubens* and *G. texensis*, we used the approximate Bayesian  
176 computation framework (ABC, Beaumont *et al.* 2002). We used ABCsampler from the ABCtoolbox  
177 package (Wegmann et al. 2009) to simulate our data under different demographic scenarios in fastsimcoal  
178 v2.5.2.3 (Excoffier and Foll 2011; Excoffier et al. 2013) and to calculate summary statistics using  
179 arlsumstat v.3.5.1.3 in Arlequin v 3.5 (Excoffier and Lischer 2010). We performed the analysis using the  
180 sequences from 1000 randomly drawn contigs (not including contigs with zero SNPs), using fixed  
181 recombination and mutation rates (both 1e-8) and the same minor allele frequency cut-off for the  
182 simulated data as for the observed data (0.025). We initially calculated all between population summary  
183 statistics supported by arlsumstat. Then, using partial least squares regression (PLS), we retained the  
184 summary statistics with the highest predictive power (i.e. those with high factor loadings on the PLS  
185 components that significantly increase the predictive power of parameter estimates) for demographic  
186 estimates: the between-species mean and standard deviation of the number of polymorphic sites, the

187 number of private polymorphic sites, Tajima's D, and nucleotide diversity ( $\pi$ ) in each species, as well as  
188 pairwise (between species)  $F_{ST}$  and  $\pi$ .

189 The demographic scenarios we compared are given in Fig. 3. We intentionally considered only relatively  
190 simple models with few parameters to avoid the risk of overparameterization (Csilléry et al. 2010). We  
191 first ran 200,000 iterations of a simple divergence model (DIV, 4 parameters, Fig. 3A), three gene-flow  
192 scenarios [Fig. 3B, continuous gene flow (CGF 6 parameters), ancestral gene flow (AGF 7 parameters),  
193 and recent gene flow (i.e., secondary contact, RGF, 7 parameters)], and three bottleneck models [Fig. 3C,  
194 bottleneck in *G. rubens* (RB, 6 parameters), in *G. texensis* (TB, 6 parameters), and in both species (BB, 8  
195 parameters)]. Prior ranges for population sizes and time points were chosen on a log-uniform scale  
196 spanning across several orders of magnitude and for bottleneck size and migration rates on a uniform scale  
197 not overlapping zero (Table 1).

198 After simulating the scenarios, model selection and posterior predictive checks were performed in R.  
199 Because of their similarity, the three bottleneck models and the three gene flow models were treated as  
200 two groups of models that were first tested inter-se; the best model of each group was then tested against  
201 the other models. We first retained the 1% samples with the smallest Euclidean distance between the  
202 summary statistics of the simulated data and the observed data ('1% nearest posterior samples' from  
203 hereon) for each scenario separately. We then obtained a set of linear discriminants that maximized the  
204 distance among models within the nested categories (gene flow and presence of bottleneck). Next,  
205 posterior model probabilities were calculated based on these linear combinations of summary statistics  
206 using the 'postpr' function in the 'abc' package (Csilléry et al. 2012), retaining one gene flow (AGF) and  
207 one bottleneck model (RB) with the highest posterior probability ('best model' from hereon). Finally, we  
208 repeated model selection to select among a simple divergence scenario (DIV), the best gene flow (AGF)  
209 and bottleneck (RB) scenarios, and a scenario combining the best gene flow and the best bottleneck  
210 scenario (AGFRB, 9 parameters, Fig. 3D). Model selection was validated by performing leave-one-out  
211 cross validation with logistic regression.



212 To estimate demographic parameters, we then ran 1,000,000 new simulations under the model(s) with the  
213 highest posterior probability. Posterior predictive checks were performed by calculating the predicted  $R^2$   
214 and root mean squared error prediction (RMSEP) using the ‘pls’ package (Mevik and Wehrens 2007). We  
215 also used the ‘cv4abc’ function from the ‘abc’ package to evaluate prediction error. We estimated the  
216 demographic parameters with the ‘abc’ function using non-linear regression and a tolerance rate of 0.05.  
217 We were also interested in assessing the effects of demography, in particular the timing of gene flow, on  
218 the *patterns* of transcriptome-wide genetic variation (*i.e.* the  $F_{ST}$  distribution), rather than only on  
219 summary statistics. Therefore, for the 1% nearest posterior samples of the models simulating continuous,  
220 recent, and ancestral gene flow and the AGFRB model we obtained the simulated  $F_{ST}$  distribution for each  
221 posterior sample. The median and variation of these distributions were then visually contrasted with the  
222 observed  $F_{ST}$  distribution.

### 223 *The role of selection*

224 To assess the role of selection in driving genetic divergence, we employ two approaches that differ in their  
225 sensitivity to distinguish signals of selection from the confounding effects from past demographic events.  
226 Given sufficiently long divergence times and high levels primary or secondary gene flow, elevated  
227 sequence divergence can contrast the regions harboring loci involved in reproductive isolation from the  
228 rest of the genome (Nachman and Payseur 2012; Cruickshank and Hahn 2014). A recent selective sweep  
229 can also increase between population differentiation and decrease within population diversity, as well as  
230 shift the allele frequency spectrum (AFS) towards a higher frequency of rare alleles.

231 We thus considered loci to be potentially under positive or divergent selection if they exceeded genomic  
232 background levels of (1) absolute sequence divergence ( $d_{xy}$ ) or (2) frequencies of rare alleles, low  
233 diversity, and high differentiation. We used VCFtools (Danecek et al. 2011) to calculate the following  
234 summary statistics: Tajima’s D (Tajima 1989), nucleotide diversity  $\pi$  (Nei and Li 1979), and weighted  $F_{ST}$   
235 (Weir and Cockerham 1984) in 1000 bp windows, and the absolute difference between the frequency of  
236 the major allele in the two species. We also calculated the average interspecific pairwise distance  $d_{xy}$  for  
237 each window as  $d_{xy} = \pi / (1 - F_{ST})$ , where  $\pi$  is the mean of the nucleotide diversity across species and  $F_{ST}$  is

238 the weighted mean  $F_{ST}$  (Hudson et al. 1992; note that this method is similar to the often used  $d_{xy} = p_i(1-p_j)$   
239  $+ p_j(1-p_i)$ , with  $p_i$  and  $p_j$  are the major or minor allele frequencies in species  $i$  and  $j$ , averaged across  
240 windows, weighed by the number of SNPs). We retained the top 1% contigs with respect to  $d_{xy}$  predicting  
241 that these loci have diverged relatively early in the evolutionary history and remained shielded from gene  
242 flow throughout. We also retained all loci for *G. texensis* and *G. rubens* separately that had Tajima's D  
243 below the 5% lowest simulated Tajima's D values under the inferred demographic scenario and with  
244 values for  $\pi$  and  $F_{ST}$  in the lowest and highest 10%, respectively.

245 For both these sets of outliers we checked for enriched Gene Ontology terms using 'topGO' (Alexa and  
246 Rahnenfuhrer 2016), part of the Bioconductor toolkit in R. The GO annotation was obtained from the *G.*  
247 *rubens* reference transcriptome (Berdan et al. 2016), which used the GO mapping module in Blast2Go  
248 (Conesa et al. 2005). We limited our gene set enrichment to biological process terms only and used the  
249 parent-child algorithm (Grossmann et al. 2007) to correct the  $P$  values for the 'inheritance problem' (i.e.,  
250 the problem that higher GO terms inherit annotations from more specific descendant terms leading to false  
251 positives). We considered any GO term significantly enriched if the false discovery rate (Benjamini and  
252 Hochberg 1995) associated with the corrected P-value was below 10%. Additionally, to get a more  
253 detailed picture of the putative functions of outlier loci, we looked up the GO annotation for the gene  
254 product with the highest similarity on Flybase (Gramates et al. 2017).

## 255 **RESULTS**

### 256 *Transcriptomic divergence*

257 We sequenced RNA from 40 individuals (20 *G. rubens* and 20 *G. texensis*) on a HiSeq 2000 (Illumina,  
258 San Diego, CA, USA) obtaining on average 51,046,578 100-bp reads per individual (range 37,887,468-  
259 72,304,968) at a sequencing depth of eight libraries per lane. Reads mapped to the *G. rubens*  
260 transcriptome at an average rate of 83.2% (Table S1). Mapping rates were not higher in *G. rubens* despite  
261 the use of the *G. rubens* transcriptome (*G. rubens*: 82.5%; *G. texensis*: 83.9%; one-tailed t-test  $T = -0.854$   
262  $df=19$   $P = 0.199$ ), but females mapped at a significantly higher rate than males (86.2% versus 80.2%; two-  
263 tailed t-test  $T = 4.68$   $df=19$   $P < 0.0001$ ). At a MAF cut-off of 0.025 we found a total of 175,244 SNPs.

264 The average transition-transversion ratio was 1.6:1. Nucleotide diversity ( $\pi$ ) was similar among *G. rubens*  
265 ( $\pi = 0.11$ ,  $\sigma_{\pi} = 0.14$ ) and *G. texensis* ( $\pi = 0.13$ ,  $\sigma_{\pi} = 0.15$ ). Median  $D$  was 0.07 (first quantile: 0.05, third  
266 quantile 0.20) and 2.7% of the SNPs (4,828) were fixed between the species (Fig. 2A). Average Tajima's  
267  $D$  was negative for both species, but the distribution across loci showed substantial variation (Fig. 2B, C).

### 268 *The demographic history*

269 We found no substantial evidence for population substructure within either species. The species axis was  
270 the predominant axis of variation among individuals in the Principal Component Analysis (23.93% of total  
271 SNP variation, Fig. S1A), followed by axes separating *G. texensis* (PC2, 6.13%) and *G. rubens* (PC4,  
272 4.35%) individuals. Variation within species was not related to geographic locations from which the  
273 individuals were collected (Fig. S1B, C). STRUCTURE further supported the finding that neither of the  
274 species was strongly differentiated geographically. The optimal  $K$  equaled 2 when we ran STRUCTURE  
275 with both species included (Fig. S2). Examining population structure within species revealed weak  
276 evidence for population substructure in both species at  $K=2$ , but  $K = 1$  was the most parsimonious given  
277 the spread in log-likelihoods across  $K$ -values (Fig. S2). These results are robust across different subsets of  
278 SNPs and sample sizes (Fig. S3).

279 To infer the role of gene flow and bottlenecks during the evolutionary history of *G. texensis* and *G.*  
280 *rubens*, we used a nested rejection procedure to select the best model out of eight different models varying  
281 in the presence and timing of bottlenecks and gene flow (Fig. 3). The gene flow and bottleneck models  
282 with the highest posterior probability were 'ancestral gene flow' (AGF  $P_{\text{posterior}} = 0.99$  versus continuous  
283 gene flow, CGF:  $P_{\text{posterior}} = 0.00$ , and recent gene flow, RGF:  $P_{\text{posterior}} = 0.01$ ) and '*G. rubens* bottleneck'  
284 (RB  $P_{\text{posterior}} = 0.94$  versus *G. texensis* bottleneck, TB:  $P_{\text{posterior}} = 0.06$  and both bottleneck, BB:  $P_{\text{posterior}}$   
285  $= 0.00$ ), respectively. We combined these best models into a model with both ancestral gene flow and a  
286 bottleneck for *G. rubens* (AGFRB) and compared that model against a simple divergence model (DIV)  
287 and the AGF and RB models. The combined model had the highest posterior probability (AGFRB:  $P_{\text{posterior}}$   
288  $= 0.77$ ; AGF:  $P_{\text{posterior}} = 0.23$ ; DIV:  $P_{\text{posterior}} = 0.00$ ; RB:  $P_{\text{posterior}} = 0.00$ ; Fig. 3, Fig. 4). Similar results were

289 obtained using the full sample, including additional, but potentially related individuals: AGFRB:  $P_{\text{posterior}} =$   
290 0.75; AGF:  $P_{\text{posterior}} = 0.21$ ; DIV:  $P_{\text{posterior}} = 0.03$ ; RB:  $P_{\text{posterior}} = 0.01$ ).

291 As posterior probabilities may differ even among very similar models, it is critical to evaluate statistical  
292 support for model choice. Overall, model choice was well supported. For each selection step, we used  
293 cross validation to verify that models can be distinguished by assuming one of the models is the ‘true’  
294 model and then performing 1,000 independent model selection steps under that assumption. The accuracy  
295 with which the assumed ‘true’ model was chosen was high for the gene flow models 97%, 58%, and 56%  
296 for AGF, CGF, and RGF, respectively), bottleneck models (86%, 86%, and 72% of the time for RB, TB,  
297 and BB respectively), and the final model selection step (86%, 82%, 92%, 96% for DIV, AGF, RB,  
298 AGFRB, respectively). It is important to note that the AGFRB model had the highest support overall and  
299 final model selection was well supported, but there is overlap of the posterior distribution of the summary  
300 statistics in multivariate space between the AGF and AGFRB models (Fig. 4).

301 Because there was some overlap between the posteriors of AGF and AGFRB (Fig. 4), and AGFRB only  
302 differs from AGF in the addition of a bottleneck, both models were used to infer the evolutionary history.  
303 Divergence times were distributed rather widely in both the AGF and AGFRB scenario, but the median of  
304 both models was around 350,000 years ago (700,000 generations ago). The ancestral effective population  
305 size was estimated around 250,000, an order of magnitude higher than the model estimates for current  
306 effective population sizes in *G. rubens* (~53,000 for AGFRB and ~18,000 for AGF) and *G. texensis*  
307 (~83,000 and ~58,000; Table 1, Table S2, Fig. 6A). A bottleneck for *G. rubens* was estimated at 11% of  
308 the current effective population size (Table 1, Fig. 6C) and recovery to current population sizes was  
309 achieved around 22,000 years ago (Table 1, Fig. 6B). Ancestral gene flow was bidirectional (median  $m =$   
310 0.32 and 0.13 for gene flow from *G. texensis* into *G. rubens* and vice versa, respectively; Table 1, Fig. 6C)  
311 and ceased around 16,000 years ago (Table 1, Table S2, Fig. 6B). The parameter estimates for the main  
312 model, AGFRB, were robust to the inclusion of additional, but potentially related, individuals; except for  
313 the median divergence time and the timepoint of recovery from the bottleneck (both higher for the full

314 data), the inclusion of more samples gave similar results but at slightly higher accuracy (narrower HPD  
315 interval, Table S3, Fig. S4).

316 Statistical support for parameter inference varied across demographic events. Overall, the observed  
317 summary statistics fell well within the range of the simulated multivariate summary statistics under the  
318 AGF and AGFRB models (Fig. 4) and 95% HPD intervals of the distributions were generally narrow (Fig.  
319 6, Table 1). For some demographic parameters (current population sizes for *G. rubens* [ $N_{RUB}$ ] and *G.*  
320 *texensis* [ $N_{TEX}$ ], and time since cessation of gene flow [ $T_{ISO}$ ]) support was high ( $R^2 > 0.81$ ; RMSEP  $< 0.44$ );  
321 for other parameters estimated error rates were appreciably higher (Table 1, Table S2).

322 We compared  $F_{ST}$  distributions simulated under the AGF, CGF, RGF, and AGFRB models with the  
323 observed  $F_{ST}$  distribution as a measure of the effect of demography on the patterns of transcriptome-wide  
324 genetic variation. We found that the observed distribution (red line in Fig. 5) closely matched the  
325 simulated distribution of the two models with ancestral gene flow for most parts, including the secondary  
326 peak at the highest  $F_{ST}$  bin ( $0.95 < F_{ST} \leq 1.00$ , Fig. 5C, D). In contrast, the observed  $F_{ST}$  distribution  
327 showed substantial mismatch with the recent and continuous gene flow models.

### 328 *The role of selection*

329 There were 80 contigs with  $d_{xy}$  values in the 99<sup>th</sup> percentile. The putative gene products corresponding to  
330 these 80 contigs were significantly enriched (FDR  $< 10\%$ ) for pheromone biosynthesis, hormone  
331 biosynthesis, mating behaviour, and protein maturation (Table 2). Several of the most divergent loci match  
332 genes involved in *Drosophila melanogaster* sex pheromone pathways, such as  *$\alpha$ -esterase* and  
333 *Desaturase1*, mushroom body development and neuromuscular synaptic targets, such as *S-lap1* and *trn*,  
334 and acoustic mating behaviour, such as *Juvenile hormone esterase* and *calmodulin* (Table S4).

335 There were 55 and 92 contigs that showed possible signatures of recent selective sweeps (Tajima's D  
336 below 5% of the simulated sequences under the AGFRB scenario and  $\pi$  and  $F_{ST}$  in the 90<sup>th</sup> percentile) in  
337 *G. texensis* and *G. rubens*, respectively. The combined set of outlier loci was not significantly enriched for  
338 any biological processes after FDR correction. The most strongly enriched GO terms were predominantly

339 higher order GO terms such as ‘organelle organization’, ‘primary metabolic process’, and ‘regulation of  
340 biological process’, but also contained more specific terms: ‘sperm mitochondrion organization’, ‘oocyte  
341 fate determination’, and ‘regulation of female receptivity’ (Table 2). Six contigs were shared between the  
342 species-specific sets. Three of these have no functionally characterized gene products, the other three are  
343 *neuroglian* (*nrg*), which is involved in various aspects of nervous system development and associated with  
344 male and female courtship behavior in *D. melanogaster*; *discs large 1* (*dlg1*), which affects neuromuscular  
345 junctions and changes fruit fly behaviour across several domains including circadian activity and  
346 courtship; and *secretory 23* (*sec23*), which is an important component in differentiation of extra-cellular  
347 membranes in neurons and epithelial cells (Table S5). Several other gene products associated with contigs  
348 in the species- specific sets have functional roles in calcium or potassium channel activity (e.g., *nervana2*,  
349 expressed in the *Drosophila* auditory organs), nervous system development (e.g. *muscleblind*, which also  
350 alters female receptivity during courtship), veined-wing song generation (e.g. *period*), as well as many  
351 genes related to metabolic and cellular processes.

## 352 **DISCUSSION**

353 Here, we illuminate the role of demographic and selective processes in the divergence of *Gryllus rubens*  
354 and *G. texensis*, sibling species with large, overlapping distributions and strong phenotypic divergence in  
355 sexual traits with limited divergence in other phenotypes. We find strong support for a long history of  
356 ancestral gene flow and a bottleneck following the origin of *G. rubens*. Importantly, our data also lend  
357 support to the hypothesis that loci that show high interspecific differentiation relative to the genomic  
358 background may do so mostly because of demographic and other neutral processes, rather than due to the  
359 interplay between gene flow and selection. Interestingly, several loci that reveal a putative role for positive  
360 or divergent selection are potential orthologs of *D. melanogaster* genes involved in (chemical and  
361 acoustic) mating behavior, the main distinctive phenotype in this system and the strongest form of  
362 reproductive isolation between the species. This work represents an important first step in assessing the  
363 contribution of neutral and selective forces to genetic divergence in a model system for sexual selection  
364 research.

365 *Neutral divergence and demography*

366 We sequenced the transcriptomes of 40 individuals across four populations. Our observed  
367 transition:transversion ratio of 1.6:1 compares well with the estimate (1.55) from another cricket species  
368 pair, *G. firmus* and *G. pennsylvanicus* (Andrés et al. 2013), and suggests that sequencing errors did not  
369 contribute unduly to SNP discovery. Divergence across ~175K SNPs showed a bimodal and slightly right-  
370 skewed distribution of absolute (allele frequency) divergence,  $D$  (Fig. 2), and genetic differentiation,  $F_{ST}$   
371 (Fig. 5). The  $F_{ST}$  distributions simulated under our top two scenarios were also right-skewed and strongly  
372 resembled the observed distribution of genetic differentiation, in strong contrast to  $F_{ST}$  distributions  
373 corresponding to other models. Most importantly the simulated distributions under the most likely  
374 demographic scenarios, AGF and AGFRB, showed secondary peaks at  $F_{ST} > 0.95$ . This indicates that a  
375 significant proportion of our fixed loci may have risen to fixation due to neutral effects and emphasizes  
376 the shortcomings of traditional  $F_{ST}$  outlier approaches (Narum and Hess 2011; Lotterhos and Whitlock  
377 2014).

378 We find strong evidence for a long history of bidirectional gene flow before *G. rubens* and *G. texensis*  
379 became fully reproductively isolated around 16,000 years ago, sometime during the last Pleistocene  
380 glacial cycles. This finding adds to a growing body of work that suggest divergence can occur in the face  
381 of gene flow (Bolnick and Fitzpatrick 2007; Nosil 2008; Bird et al. 2012; Feder et al. 2013). A large  
382 amount of recent work has focused on the role of gene flow in speciation, especially in combination with  
383 divergent or positive selection. In the genic view of speciation (Wu 2001) most areas of the genome are  
384 homogenized among populations during divergence with gene flow, and regions showing excess  
385 differentiation are thus likely protected by selection. This idea has been tested in many model systems  
386 with mixed results (Turner et al. 2005; Ellegren et al. 2012; Nosil et al. 2012; Cruickshank and Hahn  
387 2014; Burri et al. 2015; Marques et al. 2016). Recent work suggests that genomic mosaics may in fact be  
388 mostly a consequence of linked selection caused by differences in recombination rates and density of  
389 selected loci and are thus expected to be conserved in pairwise comparisons even among distantly related  
390 taxa (Nachman and Payseur 2012; Burri et al. 2015; Van Doren et al. 2017). Our results support this idea



391 as our demographic simulations recreated heterogeneous patterns similar to our observed data. Although  
392 selection certainly contributed to transcriptome divergence in *G. rubens* and *G. texensis* our results  
393 suggest a larger role for neutral processes.

394 In addition to bi-directional gene flow, the early stages of divergence between *G. texensis* and *G. rubens*  
395 were also influenced by a substantial bottleneck in *G. rubens*. There is some overlap between the AGF (no  
396 bottleneck) and AGFRB (with a *G. rubens* bottleneck) scenarios in the simulated summary statistic  
397 distribution, but the latter has a substantially higher posterior probability and corroborates the peripatric  
398 origin for *G. rubens* hypothesized in a previous study (Gray et al. 2008). Although that study used a single  
399 mitochondrial locus, it was done with extensive geographic sampling, and both studies suggest a  
400 bottleneck for *G. rubens*. Furthermore, estimates of strong admixture between populations within species  
401 and divergence time estimates are overlapping (this study: median ~ 0.35 million years ago; Gray *et al.*  
402 study: 0.25 – 2.0 mya). Estimates for current effective population sizes (roughly between 50 and 80  
403 thousand for the AGFRB model and between 20 and 60 thousand for the AGF model) are surprisingly low  
404 given the potential census population size for *G. texensis* is in the millions (Gray et al. 2008). Potentially,  
405 the discrepancy is due to recent population expansion (Ptak and Przeworski 2002; Nadachowska-brzyska  
406 et al. 2013) or variation in individual mating success (Lande and Barrowclough 1987), as is observed in  
407 wild populations of closely related species (Ritz and Köhler 2010; Rodriguez-Munoz et al. 2010).

#### 408 *The role of selection*

409 A central aim of this study was to elucidate the role of (sexual) selection during divergence within the  
410 context of the inferred demographic history. The species have strongly divergent mating behaviors with no  
411 evidence for reinforcement (Gray and Cade 2000; Higgins and Waugaman 2004; Izzo and Gray 2004;  
412 Blankers et al. 2015a). Many other cricket species show similarly strong divergence in various aspects of  
413 their mating behavior and several lines of evidence from various taxa indicate that this is at least in part  
414 driven by selection (Gray and Cade 2000; Bentsen et al. 2006; Shaw et al. 2007; Bailey 2008; Thomas and  
415 Simmons 2009; Oh and Shaw 2013; Blankers et al. 2017; Pascoal et al. 2017). Here, we show that the  
416 striking behavioral divergence is to some extent reflected in elevated sequence divergence of loci with



417 putative functions in acoustic and chemical mating behavior. We find evidence that the set of loci showing  
418 the highest levels of sequence divergence are enriched for contigs bearing significant similarity to genes  
419 with known function in mating behavior in *D. melanogaster*. In addition, among the six contigs that  
420 showed evidence for a selective sweep in both species, three are potential orthologs of genes that affect  
421 neuromuscular properties in fruit flies and have effects on the flies' mating behavior. Several other  
422 outliers are potential orthologs of genes that can be tied to mating behavior variation in *Drosophila spp.*  
423 Given the substantial time since divergence and the long history of gene flow, high sequence divergence is  
424 expected for loci that have experienced limited homogenizing effects from gene flow relative to the rest of  
425 the genome. The theoretical support for speciation with gene flow driven by divergence in secondary  
426 sexual characters is very thin at best (van Doorn et al. 2004; Weissing et al. 2011; Servedio 2015). Here  
427 we provide exciting and rare evidence for speciation with primary gene flow while both phenotypic (Gray  
428 and Cade 2000), quantitative genetic (Blankers et al. 2015b, 2017), and genomic analyses (this study) of  
429 selection highlight a role for selection on mating behavior in driving reproductive isolation. A compelling  
430 alternative interpretation of the findings here is that the peripatric origin of *G. rubens* has allowed for an  
431 initial phase of reduced gene flow; during this phase mating signals and preferences may have diverged  
432 sufficiently (aided by a founder effect following a population bottleneck) to maintain reproductive  
433 isolation during a subsequent phase of range expansion culminating into the contemporary, widespread  
434 and largely overlapping species' distributions. More empirical studies examining the role of gene flow and  
435 selection in systems characterized by strong sexual isolation are needed to test the theoretical predictions  
436 for speciation by sexual selection. However, this study along with other recent findings in finches  
437 (Campagna et al. 2017), fresh water stickleback (Marques et al. 2017), and cichlids (Malinsky et al. 2015)  
438 provide exciting first genomic insights into the role of mating behavior divergence, sexual selection, and  
439 gene flow in the earliest phases of speciation.

440 Although a large proportion of loci identified in our scan match our expectations, we acknowledge that  
441 there is a substantial risk on false positives, as both linked (background) selection and demographic effects  
442 are expected to confound the signatures of positive or divergent selection (Cruickshank and Hahn 2014;

443 Ravinet et al. 2017). By using coalescent simulations under the inferred evolutionary history, we have  
444 accounted for some confounding effects from demography. However, there is still potential neutral genetic  
445 variation that is unaccounted for, most notably the potentially confounding effects of recent population  
446 expansion and variation in recombination rates. We therefore caution that there is the uncertainty  
447 associated with the results obtained here and with genomic scans on quantitative traits in general (Jiggins  
448 and Martin 2017). Nevertheless, our findings provide exciting incentive for validation using alternative  
449 methods (e.g., QTL mapping) and follow-up functional genomic analyses.

450 Unsurprisingly, not all “outlier” contigs could be linked to mating behavior. The rest of these outliers are  
451 likely comprised of three groups: (1) Loci that are physically linked to loci under selection: In the earliest  
452 phases of speciation, only loci directly under strong divergent selection will differ. However, gene  
453 frequencies at tightly linked loci will also change and, given sufficient time as well as low to moderate  
454 migration and recombination rates, these loci will be swept to fixation along with selected sites (Smith and  
455 Haigh 1974) in a process called divergence hitchhiking (Feder et al. 2012; Via 2012); (2) Loci that are  
456 under selective forces that we have not yet elucidated: It is unlikely that divergent selection only targets  
457 loci involved in mating behavior and other traits may be differentiated between *G. rubens* and *G. texensis*.  
458 For example, females differ in the length of the ovipositor (Gray et al. 2001), a trait which reflects  
459 potential ecological adaptation to different soil types (Bradford et al. 1993); (3) Loci that are not under  
460 selection: Genetic drift can cause loci to drift to fixation and demographic effects such as bottlenecks and  
461 migration patterns (Holsinger and Weir 2009) can aid this process. Our simulations predict a significant  
462 number of fixed loci (1.90% on average for the AGFRB scenario) solely due to neutral processes (Fig. 5).  
463 Additionally, practical limitations of discovering low-frequency SNPs causing ascertainment bias (Clark  
464 et al. 2005) can contribute to misinterpretation of the patterns of genetic diversity (Vitti et al. 2013). A  
465 genomic map of *Gryllus* and further analyses would make strong headway into determining which of these  
466 categories the other potential outliers fall into.

467 Finally, there may be loci that are under selection but that were not detected by our scan because they  
468 simply were not being expressed. We sequenced samples from first generation laboratory offspring rather

469 than animals directly from the field. Despite the fact that no differences between *G. texensis* and *G. rubens*  
470 in ecology, microhabitat use, or feeding behavior have been described, the laboratory conditions have  
471 potentially limited our potential to detect genetic differences related to local adaptation.

472 The results presented here offer unprecedented insight into the evolutionary history and the role of  
473 demography and selection in driving transcriptomic divergence in two field cricket sister species. We  
474 inferred that a long period of bidirectional, ancestral gene flow and a bottleneck in *G. rubens* preceded  
475 completion of reproductive isolation (Fig. 3). Importantly, the timing of gene flow appears to have  
476 significantly influenced the pattern of divergence (i.e. the  $F_{ST}$  distribution) that we observe (Fig. 4). We  
477 also uncovered several loci that show signatures of positive or divergent selection and show that these  
478 contigs are potentially associated with courtship behavior, neuromuscular development, and chemical  
479 mating behavior. Future work will place these data on a genomic map allowing us to determine how  
480 genetic divergence is distributed relative to loci under selection. These findings provide important steps  
481 towards understanding the role of selective and neutral processes in shaping patterns of divergence and the  
482 role of sexual selection during speciation-with-gene flow. They also highlight the strength of combining  
483 information on (i) the phenotypes that contribute to reproductive isolation, (ii) demographic inference, and  
484 (iii) scans for loci under selection.

## 485 **ACKNOWLEDGEMENTS**

486 We thank Marie Jeschek and Harald Detering from the Berlin Center for Genomics and Biodiversity  
487 (BeGenDiv) for assistance in bioinformatics. We further thank Mike Ritchie, Roger Butlin, Daniel  
488 Wegmann, and Laurent Excoffier for helpful comments on the analyses and the Biostars and  
489 Stackoverflow community for help with scripting. The manuscript strongly benefited from the comments  
490 from the associate editor Jeffrey Dudycha and two anonymous reviewers. Sample collection and processing  
491 comply with the "Principles of animal care", publication No. 86-23, revised 1985 of the National Institute  
492 of Health, and also with the current laws of Germany. The authors declare no conflict of interest. This  
493 study is part of the GENART project. The work was supported by the Leibniz Association (SAW-2012-  
494 MfN-3). STV was supported by an Alexander von Humboldt Foundation fellowship.

495 **AUTHOR CONTRIBUTIONS**

496 T.B., C.J.M, F.M, and E.L.B designed the study. T.B. and D.A.G collected the samples and I.W. did the  
497 lab work. T.B, S.T.V., and E.L.B. analysed the data. T.B and E.L.B. wrote the manuscript with  
498 contributions from R.M.H, D.A.G, and S.T.V.

499 **DATA ACCESSIBILITY**

500 Data, including raw reads, sequences used for demographic analyses and SNP data files used in outlier  
501 analysis, will be made available on Dryad and the NCBI SRA archive prior to publication.

502 **CONFLICT OF INTEREST**

503 The authors declare no conflict of interest, financial or otherwise.

504 **REFERENCES**

- 505 Alexa, A., and J. Rahnenfuhrer. 2016. topGO: Enrichment Analysis for Gene Ontology.
- 506 Andrés, J. A., E. L. Larson, S. M. Bogdanowicz, and R. G. Harrison. 2013. Patterns of transcriptome  
507 divergence in the male accessory gland of two closely related species of field crickets. *Genetics*  
508 193:501–513.
- 509 Arnold, M. L. 2015. *Divergence with genetic exchange*. Oxford University Press.
- 510 Bailey, N. W. 2008. Love will tear you apart : different components of female choice exert contrasting  
511 selection pressures on male field crickets. *Behav. Ecol.* 19:960–966.
- 512 Beaumont, M. A., W. Zhang, and D. J. Balding. 2002. Approximate Bayesian Computation in Population  
513 Genetics. *Genetics* 162:2025–2035.
- 514 Benjamini, Y., and Y. Hochberg. 1995. Controlling the false discovery rate: a practical and powerful  
515 approach to multiple testing. *J. R. Stat. Soc. Ser. B* 289–300.
- 516 Bentsen, C. L., J. Hunt, M. D. Jennions, and R. Brooks. 2006. Complex multivariate sexual selection on  
517 male acoustic signaling in a wild population of *Teleogryllus commodus*. *Am. Nat.* 167:E102–E116.
- 518 Berdan, E. L., T. Blankers, I. Waurick, C. J. Mazzoni, and F. Mayer. 2016. A genes eye view of ontogeny:  
519 De novo assembly and profiling of a *Gryllus rubens* transcriptome. *Mol. Ecol. Resour.* 16:1478–  
520 1490.
- 521 Berdan, E. L., C. J. Mazzoni, I. Waurick, J. T. Roehr, and F. Mayer. 2015. A population genomic scan in  
522 *Chorthippus* grasshoppers unveils previously unknown phenotypic divergence. *Mol. Ecol.* 24:3918–  
523 30.
- 524 Bird, C. E., I. Fernandez-Silva, D. J. Skillings, and R. J. Toonen. 2012. Sympatric Speciation in the Post  
525 “Modern Synthesis” Era of Evolutionary Biology. *Evol. Biol.* 39:158–180.

- 526 Blankers, T., D. A. Gray, and R. M. Hennig. 2017. Multivariate Phenotypic Evolution: Divergent  
527 Acoustic Signals and Sexual Selection in *Gryllus* Field Crickets. *Evol. Biol.* 44:43–55.
- 528 Blankers, T., R. M. Hennig, and D. A. Gray. 2015a. Conservation of multivariate female preference  
529 functions and preference mechanisms in three species of trilling field crickets. *J. Evol. Biol.* 28:630–  
530 641.
- 531 Blankers, T., A. K. Lübke, and R. M. Hennig. 2015b. Phenotypic variation and covariation indicate high  
532 evolvability of acoustic communication in crickets. *J. Evol. Biol.* 28:1656–69.
- 533 Bolnick, D. I., and B. M. Fitzpatrick. 2007. Sympatric Speciation : Models and Empirical Evidence. *Annu.*  
534 *Rev. Ecol. Evol. Syst.* 38:459–487.
- 535 Bradford, M. J., P. A. Guerette, and D. A. Roff. 1993. Testing hypotheses of adaptive variation in cricket  
536 ovipositor lengths. *Oecologia* 93:263–267.
- 537 Burri, R., A. Nater, T. Kawakami, C. F. Mugal, P. I. Olason, L. Smeds, A. Suh, L. Dutoit, S. Bures, L. Z.  
538 Garamszegi, S. Hogner, J. Moreno, A. Qvarnstrom, M. Ruzic, S. A. Saether, G. P. Saetre, J. Torok,  
539 and H. Ellegren. 2015. Linked selection and recombination rate variation drive the evolution of the  
540 genomic landscape of differentiation across the speciation continuum of *Ficedula* flycatchers.  
541 *Genome Res.* 25:1656–1665.
- 542 Campagna, L., M. Repenning, L. F. Silveira, C. S. Fontana, P. L. Tubaro, and I. J. Lovette. 2017.  
543 Repeated divergent selection on pigmentation genes in a rapid finch radiation. *Sci. Adv.* 3:e1602404.
- 544 Clark, A. G., M. J. Hubisz, C. D. Bustamante, S. H. Williamson, and R. Nielsen. 2005. Ascertainment bias  
545 in studies of human genome-wide polymorphism. *Genome Res.* 15:1496–1502.
- 546 Conesa, A., S. Götz, J. M. García-Gómez, J. Terol, M. Talón, and M. Robles. 2005. Blast2GO: A  
547 universal tool for annotation, visualization and analysis in functional genomics research.  
548 *Bioinformatics* 21:3674–3676.
- 549 Coyne, J. A., and H. A. Orr. 2004. *Speciation*. Sinauer, Sunderland, MA.
- 550 Cruickshank, T. E., and M. W. Hahn. 2014. Reanalysis suggests that genomic islands of speciation are due  
551 to reduced diversity, not reduced gene flow. *Mol. Ecol.* 23:3133–3157.
- 552 Csilléry, K., M. G. B. Blum, O. E. Gaggiotti, and O. François. 2010. Approximate Bayesian Computation  
553 (ABC) in practice. *Trends Ecol. Evol.* 25:410–418.
- 554 Csilléry, K., O. François, and M. Blum. 2012. Approximate Bayesian Computation (ABC) in R: A  
555 Vignette. 202.162.217.53 1–21.
- 556 Cutter, A. D., and B. A. Payseur. 2013. Genomic signatures of selection at linked sites: unifying the  
557 disparity among species. *Nat. Rev. Genet.* 14:262–274.
- 558 Danecek, P., A. Auton, G. Abecasis, C. A. Albers, E. Banks, M. A. DePristo, R. E. Handsaker, G. Lunter,  
559 G. T. Marth, S. T. Sherry, G. McVean, R. Durbin, and 1000 Genomes Project Analysis Group. 2011.  
560 The variant call format and VCFtools. *Bioinforma.* 27:2156–2158.
- 561 DePristo, M. A., E. Banks, R. Poplin, K. V Garimella, J. R. Maguire, C. Hartl, A. A. Philippakis, G. del  
562 Angel, M. A. Rivas, M. Hanna, A. McKenna, T. J. Fennell, A. M. Kernytsky, A. Y. Sivachenko, K.  
563 Cibulskis, S. B. Gabriel, D. Altshuler, and M. J. Daly. 2011. A framework for variation discovery  
564 and genotyping using next-generation DNA sequencing data. *Nat. Genet.* 43:491–498.

- 565 Dodt, M., J. T. Roehr, R. Ahmed, and C. Dieterich. 2012. FLEXBAR—flexible barcode and adapter  
566 processing for next-generation sequencing platforms. *Biology*. 1:895–905.
- 567 Earl, D., and B. vonHoldt. 2012. STRUCTURE HARVESTER: a website and program for visualizing  
568 STRUCTURE output and implementing the Evanno method. *Conserv. Genet. Resour.* 4:359–361.
- 569 Ellegren, H., L. Smeds, R. Burri, P. I. Olason, N. Backström, T. Kawakami, A. Künstner, H. Mäkinen, K.  
570 Nadachowska-Brzyska, A. Qvarnström, S. Uebbing, and J. B. W. Wolf. 2012. The genomic  
571 landscape of species divergence in *Ficedula* flycatchers. *Nature* 1–5.
- 572 Evanno, G., S. Regnaut, and J. Goudet. 2005. Detecting the number of clusters of individuals using the  
573 software STRUCTURE: a simulation study. *Molecular Ecology*. *Mol. Ecol.* 14:2611–2620.
- 574 Excoffier, L., I. Dupanloup, E. Huerta-Sánchez, V. C. Sousa, and M. Foll. 2013. Robust Demographic  
575 Inference from Genomic and SNP Data. *PLoS Genet.* 9.
- 576 Excoffier, L., and M. Foll. 2011. fastsimcoal: a continuous-time coalescent simulator of genomic diversity  
577 under arbitrarily complex evolutionary scenarios. *Bioinformatics* 27:1332–1334.
- 578 Excoffier, L., and H. E. L. Lischer. 2010. Arlequin suite ver 3.5: A new series of programs to perform  
579 population genetics analyses under Linux and Windows. *Mol. Ecol. Resour.* 10:564–567.
- 580 Falush, D., M. Stephens, and J. K. Pritchard. 2003. Inference of Population Structure Using Multilocus  
581 Genotype Data: Linked Loci and Correlated Allele Frequencies. *Genet.* 164:1567–1587.
- 582 Feder, J. L., S. P. Egan, and P. Nosil. 2012. The genomics of speciation-with-gene-flow. *Trends Genet.*  
583 28:342–350.
- 584 Feder, J. L., S. M. Flaxman, S. P. Egan, A. A. Comeault, and P. Nosil. 2013. Geographic Mode of  
585 Speciation and Genomic Divergence. *Annu. Rev. Ecol. Evol. Syst.* 44:73–97.
- 586 Gerhardt, H. C., and F. Huber. 2002. Acoustic communication in insects and anurans. The University of  
587 Chicago Press, Chicago.
- 588 Göpfert, M. C., and R. M. Hennig. 2016. Hearing in Insects. *Annu. Rev. Entomol.* 61:annurev-ento-  
589 010715-023631.
- 590 Gramates, L. S., S. J. Marygold, G. dos Santos, J.-M. Urbano, G. Antonazzo, B. B. Matthews, A. J. Rey,  
591 C. J. Tabone, M. A. Crosby, D. B. Emmert, K. Falls, J. L. Goodman, Y. Hu, L. Ponting, A. J.  
592 Schroeder, V. B. Strelets, J. Thurmond, and P. Zhou. 2017. FlyBase at 25: looking to the future.  
593 *Nucleic Acids Res.* 45:D663–D671.
- 594 Gray, D. A. 2005. Does courtship behavior contribute to species-level reproductive isolation in field  
595 crickets? *Behav. Ecol.* 16:201–206.
- 596 Gray, D. A. 2011. Speciation, divergence, and the origin of *Gryllus rubens*: behavior, morphology, and  
597 molecules. *Insects* 2:195–209.
- 598 Gray, D. A., H. Huang, and L. L. Knowles. 2008. Molecular evidence of a peripatric origin for two  
599 sympatric species of field crickets (*Gryllus rubens* and *G. texensis*) revealed from coalescent  
600 simulations and population genetic tests. *Mol. Ecol.* 17:3836–3855.
- 601 Gray, D. A., T. J. Walker, B. E. Conley, and W. H. Cade. 2001. A morphological means of distinguishing  
602 females of the cryptic field cricket species, *Gryllus rubens* and *G. texensis* (Orthoptera : Gryllidae).  
603 *Florida Entomol.* 84:314–315.



- 604 Gray, D., and W. Cade. 2000. Sexual selection and speciation in field crickets. *Proc Natl. Acad. Sci.*  
605 97:14449–14454.
- 606 Grossmann, S., S. Bauer, P. N. Robinson, and M. Vingron. 2007. Improved detection of  
607 overrepresentation of Gene-Ontology annotations with parent--child analysis. *Bioinformatics*  
608 23:3024–3031.
- 609 Hennig, R. M., K.-G. Heller, and J. Clemens. 2014. Time and timing in the acoustic recognition system of  
610 crickets. *Front. Physiol.* 5.
- 611 Higgins, L. a., and R. D. Waugaman. 2004. Sexual selection and variation: A multivariate approach to  
612 species-specific calls and preferences. *Anim. Behav.* 68:1139–1153.
- 613 Holsinger, K. E., and B. S. Weir. 2009. Genetics in geographically structured populations: defining,  
614 estimating and interpreting FST. *Nat. Rev. Genet.* 10:639–650.
- 615 Hudson, R. R., M. Slatkin, and W. P. Maddison. 1992. Estimation of levels of gene flow from DNA  
616 sequence data. *Genetics* 132:583–589.
- 617 Izzo, A. S., and D. a. Gray. 2011. Heterospecific courtship and sequential mate choice in sister species of  
618 field crickets. *Anim. Behav.* 81:259–264.
- 619 Izzo, A. S., and D. A. Gray. 2004. Cricket song in sympatry: Species specificity of song without  
620 reproductive character displacement in *Gryllus rubens*. *Ann. Entomol. Soc. Am.* 97:831–837.
- 621 Jiggins, C. D., and S. H. Martin. 2017. Glittering gold and the quest for Isla de Muerta. *J. Evol. Biol.*  
622 30:1509–1511.
- 623 Lande, R. L., and G. F. Barrowclough. 1987. Effective population size, genetic variation, and their use in  
624 population management. Pp. 87–124 *in* M. E. Soule, ed. *Viable populations for conservation*.  
625 Cambridge University Press, Cambridge, NY.
- 626 Langmead, B., and S. L. Salzberg. 2012. Fast gapped-read alignment with Bowtie 2. *Nat. Methods* 9:357–  
627 359.
- 628 Lotterhos, K. E., and M. C. Whitlock. 2014. Evaluation of demographic history and neutral  
629 parameterization on the performance of FST outlier tests. *Mol. Ecol.* 23:2178–2192.
- 630 Malinsky, M., R. J. Challis, A. M. Tyers, S. Schiffels, Y. Terai, B. P. Ngatunga, E. A. Miska, R. Durbin,  
631 M. J. Genner, and G. F. Turner. 2015. Genomic islands of speciation separate cichlid ecomorphs in  
632 an East African crater lake. *Science* 350:1493–1498.
- 633 Maroja, L. S., Z. M. McKenzie, E. Hart, J. Jing, E. L. Larson, and D. P. Richardson. 2014. Barriers to  
634 gene exchange in hybridizing field crickets: the role of male courtship effort and cuticular  
635 hydrocarbons. *BMC Evol. Biol.* 14:65.
- 636 Marques, D. A., K. Lucek, M. P. Haesler, A. F. Feller, J. I. Meier, C. E. Wagner, L. Excoffier, and O.  
637 Seehausen. 2017. Genomic landscape of early ecological speciation initiated by selection on nuptial  
638 colour. *Mol. Ecol.* 26:7–24.
- 639 Marques, D. A., K. Lucek, J. I. Meier, S. Mwaiko, C. E. Wagner, L. Excoffier, and O. Seehausen. 2016.  
640 Genomics of Rapid Incipient Speciation in Sympatric Threespine Stickleback. *PLoS Genet.* 12:1–34.
- 641 Mayr, E. 1963. *Animal Species and Evolution*. Harvard University Press.

- 642 Mevik, B.-H., and R. Wehrens. 2007. The pls Package: Principal Component and Partial Least Squares  
643 Regression in R. *J. Stat. Softw.* 18:1–24.
- 644 Nachman, M. W., and B. A. Payseur. 2012. Recombination rate variation and speciation: theoretical  
645 predictions and empirical results from rabbits and mice. *Philos. Trans. R. Soc. B Biol. Sci.* 367:409–  
646 421.
- 647 Nadachowska-brzyska, K., R. Burri, P. I. Olason, T. Kawakami, and H. Ellegren. 2013. Demographic  
648 Divergence History of Pied Flycatcher and Collared Flycatcher Inferred from Whole-Genome Re-  
649 sequencing Data. *PLoS Genet.* 9:e1003942.
- 650 Narum, S. R., and J. E. Hess. 2011. Comparison of FST outlier tests for SNP loci under selection. *Mol.*  
651 *Ecol. Resour.* 11:184–194.
- 652 Nei, M., and W.-H. Li. 1979. Mathematical model for studying genetic variation in terms of restriction  
653 endonucleases. *Proc. Natl. Acad. Sci.* 76:5269–5273.
- 654 Noor, M. A. F., and S. M. Bennett. 2009. Islands of speciation or mirages in the desert? Examining the  
655 role of restricted recombination in maintaining species. *Heredity.* 103:439–44.
- 656 Nosil, P. 2008. Speciation with gene flow could be common. *Mol. Ecol.* 17:2103–2106.
- 657 Nosil, P., D. J. Funk, and D. Ortiz-Barrientos. 2009. Divergent selection and heterogeneous genomic  
658 divergence. *Mol. Ecol.* 18:375–402.
- 659 Nosil, P., T. L. Parchman, J. L. Feder, and Z. Gompert. 2012. Do highly divergent loci reside in genomic  
660 regions affecting reproductive isolation? A test using next-generation sequence data in *Timema* stick  
661 insects. *BMC Evol. Biol.* 12:164.
- 662 Oh, K. P., and K. L. Shaw. 2013. Multivariate sexual selection in a rapidly evolving speciation phenotype.  
663 *Proc. Biol. Sci.* 280:20130482.
- 664 Ortiz-Barrientos, D., and M. E. James. 2017. Evolution of recombination rates and the genomic landscape  
665 of speciation. *J. Evol. Biol.* 30:1519–1521.
- 666 Pascoal, S., M. Mendrok, A. J. Wilson, J. Hunt, and N. W. Bailey. 2017. Sexual selection and population  
667 divergence II. Divergence in different sexual traits and signal modalities in field crickets  
668 (*Teleogryllus oceanicus*). *Evolution.* 71:1614–1626.
- 669 Ptak, S. E., and M. Przeworski. 2002. Evidence for population growth in humans is confounded by fine-  
670 scale population structure. *Trends Genet.* 18:559–563.
- 671 Purcell, S., B. Neale, K. Todd-Brown, L. Thomas, M. A. R. Ferreira, D. Bender, J. Maller, P. Sklar, P. I.  
672 W. De Bakker, M. J. Daly, and others. 2007. PLINK: a tool set for whole-genome association and  
673 population-based linkage analyses. *Am. J. Hum. Genet.* 81:559–575.
- 674 R Development Core Team, R. 2016. R: A Language and Environment for Statistical Computing. R  
675 Foundation for Statistical Computing.
- 676 Ravinet, M., R. Faria, R. K. Butlin, J. Galindo, N. Bierne, M. Rafajlović, M. A. F. Noor, B. Mehlig, and  
677 A. M. Westram. 2017. Interpreting the genomic landscape of speciation: finding barriers to gene  
678 flow. *J. Evol. Biol.* in press:1450–1477.
- 679 Ritz, M. S., and G. Köhler. 2010. Natural and sexual selection on male behaviour and morphology, and  
680 female choice in a wild field cricket population: Spatial, temporal and analytical components. *Evol.*



- 681 Ecol. 24:985–1001.
- 682 Rodriguez-Munoz, R., A. Bretman, J. Slate, C. A. Walling, and T. Tregenza. 2010. Natural and sexual  
683 selection in a wild insect population. *Science* 79:1269–1272.
- 684 Schoneich, S., K. Kostarakos, and B. Hedwig. 2015. An auditory feature detection circuit for sound  
685 pattern recognition. *Sci. Adv.* 1:e1500325–e1500325.
- 686 Seehausen, O., R. K. Butlin, I. Keller, C. E. Wagner, J. W. Boughman, P. a Hohenlohe, C. L. Peichel, G.-  
687 P. Saetre, C. Bank, A. Brännström, A. Brelsford, C. S. Clarkson, F. Eroukhanoff, J. L. Feder, M.  
688 C. Fischer, A. D. Foote, P. Franchini, C. D. Jiggins, F. C. Jones, A. K. Lindholm, K. Lucek, M. E.  
689 Maan, D. a Marques, S. H. Martin, B. Matthews, J. I. Meier, M. Möst, M. W. Nachman, E. Nonaka,  
690 D. J. Rennison, J. Schwarzer, E. T. Watson, A. M. Westram, and A. Widmer. 2014. Genomics and  
691 the origin of species. *Nat. Rev. Genet.* 15:176–92.
- 692 Servedio, M. R. 2015. Geography, assortative mating, and the effects of sexual selection on speciation  
693 with gene flow. *Evol. Appl.* doi: 10.1111/eva.12296.
- 694 Shaw, K. L., Y. M. Parsons, and S. C. Lesnick. 2007. QTL analysis of a rapidly evolving speciation  
695 phenotype in the Hawaiian cricket *Laupala*. *Mol. Ecol.* 16:2879–2892.
- 696 Smadja, C. M., and R. K. Butlin. 2011. A framework for comparing processes of speciation in the  
697 presence of gene flow. *Mol. Ecol.* 20:5123–5140.
- 698 Smith, J. M., and J. Haigh. 1974. The hitch-hiking effect of a favourable gene. *Genet. Res.* 23:23–35.
- 699 Sousa, V., and J. Hey. 2013. Understanding the origin of species with genome-scale data : modelling gene  
700 flow. *Nat. Rev. Gen.* 14:404–414.
- 701 Tajima, F. 1989. Statistical method for testing the neutral mutation hypothesis by DNA polymorphism.  
702 *Genetics* 123:585–595.
- 703 Thomas, M. L., and L. W. Simmons. 2010. Cuticular hydrocarbons influence female attractiveness to  
704 males in the Australian field cricket, *Teleogryllus oceanicus*. *J. Evol. Biol.* 23:707–714.
- 705 Thomas, M. L., and L. W. Simmons. 2009. Sexual selection on cuticular hydrocarbons in the Australian  
706 field cricket, *Teleogryllus oceanicus*. *BMC Evol. Biol.* 9:162.
- 707 Tregenza, T., and N. Wedell. 1997. Definitive evidence for cuticular pheromones in a cricket. *Anim.*  
708 *Behav.* 54:979–84.
- 709 Turner, T. L., M. W. Hahn, and S. V. Nuzhdin. 2005. Genomic islands of speciation in *Anopheles*  
710 *gambiae*. *PLoS Biol.* 3:1572–1578.
- 711 Van der Auwera, G. A., M. O. Carneiro, C. Hartl, R. Poplin, G. del Angel, A. Levy-Moonshine, T. Jordan,  
712 K. Shakir, D. Roazen, J. Thibault, E. Banks, K. V Garimella, D. Altshuler, S. Gabriel, and M. A.  
713 DePristo. 2013. From FastQ Data to High-Confidence Variant Calls: The Genome Analysis Toolkit  
714 Best Practices Pipeline. *Curr. Protoc. Bioinforma.* 43:1–11.
- 715 van Doorn, G. S., U. Dieckmann, and F. J. Weissing. 2004. Sympatric Speciation by Sexual Selection : A  
716 Critical Reevaluation. *Am. Nat.* 163:709–725.
- 717 Van Doren, B. M., L. Campagna, B. Helm, J. C. Illera, I. J. Lovette, and M. Liedvogel. 2017. Correlated  
718 patterns of genetic diversity and differentiation across an avian family. *Mol. Ecol.* 26:3982–3997.
- 719 Via, S. 2012. Divergence hitchhiking and the spread of genomic isolation during ecological speciation-

- 720 with-gene-flow. *Philos. Trans. R. Soc. B Biol. Sci.* 367:451–460.
- 721 Vitti, J. J., S. R. Grossman, and P. C. Sabeti. 2013. Detecting Natural Selection in Genomic Data. *Annu.*  
722 *Rev. Genet* 47:97–120.
- 723 Walker, T. 1998. Trilling field crickets in a zone of overlap (Orthoptera: Gryllidae: Gryllus). *Ann.*  
724 *Entomol. Soc. Am.* 91:175–184.
- 725 Wegmann, D., C. Leuenberger, and L. Excoffier. 2009. Using ABCtoolbox.
- 726 Weir, B. S., and C. C. Cockerham. 1984. Estimating F-statistics for the analysis of population structure.  
727 *Evolution.* 38:1358–1370.
- 728 Weissing, F. J., P. Edelaar, and G. S. van Doorn. 2011. Adaptive speciation theory: a conceptual review.  
729 *Behav. Ecol. Sociobiol.* 65:461–480.
- 730 Wu, C. I. 2001. The genic view of the process of speciation. *J. Evol. Biol.* 14:851–865.
- 731 Zheng, X., D. Levine, J. Shen, S. Gogarten, C. Laurie, and B. Weir. 2012. A High-performance  
732 Computing Toolset for Relatedness and Principal Component Analysis of SNP Data. *Bioinformatics*  
733 28:3326–3328.

#### 734 **FIGURE LEGENDS**

735 Fig. 1. Geographic distributions for *G. texensis* (red) and *G. rubens* (blue). The sympatric zone is marked  
736 with turquoise. The distributions are approximate and based on the Singing Insects of North America data  
737 base (<http://entnemdept.ufl.edu/Walker/buzz/>). The black dots in Texas and Florida represent the sampling  
738 locations for *G. texensis* and *G. rubens*, respectively.

739  
740 Fig. 2. Genomic divergence. The distribution of the interspecific allele frequency difference,  $D$ , across  
741 SNPs (A), of the absolute divergence,  $d_{xy}$ , in 1000 bp windows (B), and of Tajima's  $D$  in 1000 bp  
742 windows for *G. rubens* (C) and *G. texensis* (D), respectively

743  
744 Fig. 3. Demographic scenarios for Approximate Bayesian Computation. Eight scenarios were simulated  
745 under the ABC framework. (A) A simple divergence scenario (DIV) with a log uniform prior on the  
746 divergence time ( $T_{\text{SPLIT}}$ ), the ancestral population size ( $N_{\text{ANC}}$ ) and the current effective population sizes for  
747 *G. rubens* and *G. texensis* ( $N_{\text{RUB}}$ ,  $N_{\text{TEX}}$ ). (B) Three different gene flow models with either continuous gene  
748 flow (CGF), ancestral gene flow (AGF), or recent gene flow (RGF) were additionally defined by  
749 parameters describing migration rates ( $M_{\text{TEX} \rightarrow \text{RUB}}$ ,  $M_{\text{RUB} \rightarrow \text{TEX}}$ ; uniform priors not overlapping zero) and  
750 the time point of cessation of gene flow ( $T_{\text{ISO}}$ ) or secondary contact ( $T_{\text{CONT}}$ ), both with log uniform priors.  
751 (C) Three bottleneck models defined by the time point of recovery to current population sizes ( $T_{\text{BOT}}$ ; log  
752 uniform prior) and the relative population size reduction (BOTSIZ; uniform prior not overlapping zero) for  
753 *G. rubens* (RB), *G. texensis* (TB), or both (BB). (D) An additional model (AGFRB) combining the best  
754 gene flow (AGF) and best bottleneck (RB) model, marked by the black, dashed rectangles. The posterior  
755 probabilities for model selection are given left of the square (opening) brackets for the three gene flow and  
756 the three bottleneck models, and right of the square (closing) brackets for the final model selection step.

757  
758 Fig. 4. Distribution of observed and simulated data sets in multivariate summary statistic space. For each  
759 of the four models used in the final model selection step (see also Fig. 2) the distribution of the 1%  
760 posterior samples with the smallest Euclidean distance to the observed data is shown relative to the  
761 coordinates of the observed data. The multivariate summary statistic space is constrained by the first two  
762 linear discriminants (see text for details) representing linear combinations of the summary statistics used  
763 in model selection.

764

765 Fig. 5.  $F_{ST}$  distributions of simulated and observed data. The distribution of Weir and Cockerham's  $F_{ST}$  as  
 766 calculated by the program arlsumstat are shown for 2000 simulated data sets under the ancestral gene flow  
 767 and a bottleneck for *G. rubens* (AGFRB, box-and-whiskers top panel) scenario, the ancestral gene flow  
 768 (AGF, box-and-whiskers bottom panel) scenario, and the observed data (1000 haplotype sequences, red  
 769 solid line). The histograms show the density to enhance comparison between simulated and observed data.  
 770

771 Fig. 6. Demographic parameter estimation. The density distribution under the AGFRB (A-C) and the AGF  
 772 (D-F) are shown for the ancestral and current population sizes (A, D), the time point for divergence,  
 773 cessation of gene flow, and recovery to current population sizes after the bottleneck (B, E), and the  
 774 migration rates and bottleneck size (C, F). The density lines have been trimmed to the existent parameter  
 775 distribution (i.e., no density extrapolation) and have been smoothed by adjusting the bandwidth. For lines  
 776 within one panel the same smoothing bandwidth has been used.  
 777

778 **TABLES**

779

780 Table 1. ABC estimates. Prior distributions (log-scale), posterior predictive checks and posterior  
 781 parameter estimates (log scale, median and 95% highest posterior density interval) for the model are  
 782 shown.

| Parameter                                            | Prior <sup>a</sup> |          | Validation     |       | Posterior |        |       |
|------------------------------------------------------|--------------------|----------|----------------|-------|-----------|--------|-------|
|                                                      | minimum            | maximum  | R <sup>2</sup> | RMSEP | 2.5%      | Median | 97.5% |
| LOG <sub>10</sub> (N <sub>ANC</sub> )                | 4.0                | 6.0 (lu) | 0.13           | 0.93  | 4.83      | 5.46   | 6.01  |
| LOG <sub>10</sub> (N <sub>RUB</sub> )                | 3.0                | 6.0 (lu) | 0.90           | 0.32  | 4.55      | 4.73   | 4.89  |
| LOG <sub>10</sub> (N <sub>TEX</sub> )                | 3.0                | 6.0 (lu) | 0.75           | 0.50  | 4.60      | 4.92   | 5.10  |
| LOG <sub>10</sub> (T <sub>SPLIT</sub> ) <sup>b</sup> | 5.0                | 7.0 (lu) | 0.02           | 0.99  | 4.53      | 5.89   | 7.22  |
| LOG <sub>10</sub> (T <sub>ISO</sub> ) <sup>b</sup>   | 3.0                | 7.0 (lu) | 0.90           | 0.32  | 4.29      | 4.50   | 4.65  |
| LOG <sub>10</sub> (T <sub>BOT</sub> ) <sup>b</sup>   | 5.0                | 7.0 (lu) | 0.48           | 0.72  | 4.45      | 4.64   | 4.87  |
| BOTSIZE                                              | 0.01               | 0.5 (u)  | 0.16           | 0.91  | 0.02      | 0.11   | 0.31  |
| M <sub>TEX&gt;&gt;RUB</sub>                          | 0.01               | 0.5 (u)  | 0.06           | 0.97  | 0.06      | 0.32   | 0.51  |
| M <sub>RUB&gt;&gt;TEX</sub>                          | 0.01               | 0.5 (u)  | 0.06           | 0.97  | 0.02      | 0.13   | 0.38  |

783 <sup>a</sup> priors are uniformly (u) or log-uniformly (lu) distributed and do not overlap zero for migration rates  
 784 and bottleneck size.

785 <sup>b</sup> the timing of demographic events is in (logarithm of) number of generation and both species have two  
 786 generations annually.  
 787

788 Table 2. GO enrichment results. The top ten terms of the Gene Ontology enrichment is shown for the  $d_{xy}$   
 789 outliers and the Allele Frequency Spectrum (AFS) outliers. For each Biological Process, the number of  
 790 annotated transcripts and the number of observed and expected transcripts in the sample with a given  
 791 annotation are shown. The Fisher's exact test P-value is corrected using the parent-child algorithm  
 792 (Grossmann *et al.* 2007). The FDR is the false discovery rate based on the corrected P-values.  
 793

| GO         | Term                                      | #Annot   | #Sample | #Exp | P-value  | FDR    |
|------------|-------------------------------------------|----------|---------|------|----------|--------|
|            |                                           | $d_{xy}$ |         |      |          |        |
| GO:0042811 | pheromone biosynthetic process            | 44       | 4       | 0.2  | 4.30E-06 | 0.0027 |
| GO:0042810 | pheromone metabolic process               | 49       | 4       | 0.22 | 3.60E-05 | 0.0071 |
| GO:1903317 | regulation of protein maturation          | 24       | 3       | 0.11 | 3.70E-05 | 0.0071 |
| GO:0042446 | hormone biosynthetic process              | 82       | 4       | 0.37 | 4.50E-05 | 0.0071 |
| GO:1903318 | negative regulation of protein maturation | 23       | 3       | 0.1  | 0.0001   | 0.0152 |
| GO:0044705 | multi-organism reproductive behavior      | 359      | 6       | 1.62 | 0.0002   | 0.0232 |
| GO:0019098 | reproductive behavior                     | 367      | 6       | 1.65 | 0.0005   | 0.0380 |

|            |                                             |            |    |      |        |        |
|------------|---------------------------------------------|------------|----|------|--------|--------|
| GO:0007618 | mating                                      | 400        | 6  | 1.8  | 0.0005 | 0.0380 |
| GO:0006551 | leucine metabolic process                   | 3          | 2  | 0.01 | 0.0011 | 0.0734 |
|            |                                             | <b>AFS</b> |    |      |        |        |
| GO:0006996 | organelle organization                      | 2271       | 41 | 21.7 | 0.0003 | 0.3545 |
| GO:1902589 | single-organism organelle organization      | 1791       | 32 | 17.1 | 0.0004 | 0.3545 |
| GO:0044238 | primary metabolic process                   | 4836       | 59 | 46.2 | 0.0007 | 0.4181 |
| GO:0090066 | regulation of anatomical structure size     | 375        | 12 | 3.6  | 0.0014 | 0.5867 |
| GO:0050789 | regulation of biological process            | 4028       | 52 | 38.5 | 0.0025 | 0.5867 |
| GO:0030382 | sperm mitochondrion organization            | 6          | 2  | 0.1  | 0.0027 | 0.5867 |
| GO:0065007 | biological regulation                       | 4463       | 56 | 42.7 | 0.0027 | 0.5867 |
| GO:0007294 | germarium-derived oocyte fate determination | 46         | 4  | 0.4  | 0.0028 | 0.5867 |
| GO:0030716 | oocyte fate determination                   | 58         | 4  | 0.6  | 0.0033 | 0.5867 |
| GO:0045924 | regulation of female receptivity            | 7          | 2  | 0.1  | 0.0035 | 0.5867 |
| GO:0006996 | organelle organization                      | 2271       | 41 | 21.7 | 0.0003 | 0.3545 |

794 Table S1. Individual RNA-seq read mapping statistics. Mapping rates were calculated using bowtie2 with  
795 default parameters.

| Sample ID | Species            | Population | Sex | Mapping rate |
|-----------|--------------------|------------|-----|--------------|
| 30037 rub | <i>G. rubens</i>   | Ocala      | f   | 84.52%       |
| 30038 rub | <i>G. rubens</i>   | Ocala      | f   | 85.33%       |
| 30039 rub | <i>G. rubens</i>   | Ocala      | f   | 85.66%       |
| 30040 rub | <i>G. rubens</i>   | Ocala      | f   | 84.35%       |
| 30041 rub | <i>G. rubens</i>   | Ocala      | f   | 84.85%       |
| 30057 rub | <i>G. rubens</i>   | Lake City  | f   | 88.40%       |
| 30058 rub | <i>G. rubens</i>   | Lake City  | f   | 82.10%       |
| 30059 rub | <i>G. rubens</i>   | Lake City  | f   | 88.86%       |
| 30060 rub | <i>G. rubens</i>   | Lake City  | f   | 87.83%       |
| 30061 rub | <i>G. rubens</i>   | Lake City  | f   | 90.23%       |
| 30052 rub | <i>G. rubens</i>   | Ocala      | m   | 78.01%       |
| 30053 rub | <i>G. rubens</i>   | Ocala      | m   | 80.72%       |
| 30054 rub | <i>G. rubens</i>   | Ocala      | m   | 78.60%       |
| 30055 rub | <i>G. rubens</i>   | Ocala      | m   | 79.76%       |
| 30056 rub | <i>G. rubens</i>   | Ocala      | m   | 80.43%       |
| 30062 rub | <i>G. rubens</i>   | Lake City  | m   | 77.89%       |
| 30063 rub | <i>G. rubens</i>   | Lake City  | m   | 77.70%       |
| 30064 rub | <i>G. rubens</i>   | Lake City  | m   | 77.56%       |
| 30065 rub | <i>G. rubens</i>   | Lake City  | m   | 70.75%       |
| 30066 rub | <i>G. rubens</i>   | Lake City  | m   | 86.67%       |
| 30027 tex | <i>G. texensis</i> | Lancaster  | f   | 83.09%       |
| 30028 tex | <i>G. texensis</i> | Lancaster  | f   | 83.20%       |
| 30029 tex | <i>G. texensis</i> | Lancaster  | f   | 81.61%       |
| 30030 tex | <i>G. texensis</i> | Lancaster  | f   | 83.80%       |
| 30031 tex | <i>G. texensis</i> | Lancaster  | f   | 80.42%       |
| 30042 tex | <i>G. texensis</i> | Austin     | f   | 91.22%       |
| 30043 tex | <i>G. texensis</i> | Austin     | f   | 91.78%       |
| 30044 tex | <i>G. texensis</i> | Austin     | f   | 90.01%       |
| 30045 tex | <i>G. texensis</i> | Austin     | f   | 89.94%       |
| 30046 tex | <i>G. texensis</i> | Austin     | f   | 87.70%       |
| 30032 tex | <i>G. texensis</i> | Lancaster  | m   | 76.17%       |
| 30033 tex | <i>G. texensis</i> | Lancaster  | m   | 77.76%       |
| 30034 tex | <i>G. texensis</i> | Lancaster  | m   | 77.24%       |
| 30035 tex | <i>G. texensis</i> | Lancaster  | m   | 80.79%       |

|           |                    |           |   |        |
|-----------|--------------------|-----------|---|--------|
| 30036 tex | <i>G. texensis</i> | Lancaster | m | 76.77% |
| 30047 tex | <i>G. texensis</i> | Austin    | m | 86.40% |
| 30048 tex | <i>G. texensis</i> | Austin    | m | 87.22% |
| 30049 tex | <i>G. texensis</i> | Austin    | m | 88.52% |
| 30050 tex | <i>G. texensis</i> | Austin    | m | 79.15% |
| 30051 tex | <i>G. texensis</i> | Austin    | m | 86.18% |

796  
797  
798  
799  
800  
801  
802  
803

Table S2. ABC estimates for the AGF scenario. Prior distributions (log-scale), posterior predictive checks and posterior parameter estimates (log scale, median and 95% highest posterior density interval) for the model are shown.

| Parameter                                            | Prior <sup>a</sup> |          | Validation     |       | Posterior |        |       |
|------------------------------------------------------|--------------------|----------|----------------|-------|-----------|--------|-------|
|                                                      | minimum            | maximum  | R <sup>2</sup> | RMSEP | 2.5%      | Median | 97.5% |
| LOG <sub>10</sub> (N <sub>ANC</sub> )                | 4.0                | 6.0 (lu) | 0.0            | 0.96  | 4.72      | 5.36   | 5.95  |
| LOG <sub>10</sub> (N <sub>RUB</sub> )                | 3.0                | 6.0 (lu) | 0.93           | 0.27  | 3.52      | 4.27   | 4.66  |
| LOG <sub>10</sub> (N <sub>TEX</sub> )                | 3.0                | 6.0 (lu) | 0.93           | 0.27  | 3.48      | 4.77   | 5.05  |
| LOG <sub>10</sub> (T <sub>SPLIT</sub> ) <sup>b</sup> | 5.0                | 7.0 (lu) | 0.06           | 0.97  | 4.84      | 5.81   | 6.73  |
| LOG <sub>10</sub> (T <sub>ISO</sub> ) <sup>b</sup>   | 3.0                | 7.0 (lu) | 0.79           | 0.46  | 4.02      | 4.48   | 4.77  |
| M <sub>TEX&gt;&gt;RUB</sub>                          | 0.01               | 0.5 (u)  | 0.17           | 0.91  | 0.02      | 0.27   | 0.94  |
| M <sub>RUB&gt;&gt;TEX</sub>                          | 0.01               | 0.5 (u)  | 0.12           | 0.94  | 0.04      | 0.26   | 0.56  |

804 <sup>a</sup> priors are uniformly (u) or log-uniformly (lu) distributed and do not overlap zero for migration rates  
805 and bottleneck size.  
806 <sup>b</sup> the timing of demographic events is in (logarithm of) number of generation and both species have two  
807 generations annually.  
808

809 Table S3 ABC estimates for the full sample (including 8 individuals from half-sib pairs), AGFRB  
810 scenario. Prior distributions (log-scale), posterior predictive checks and posterior parameter estimates (log  
811 scale, median and 95% highest posterior density interval) for the model are shown.

| Parameter                                            | Prior <sup>a</sup> |          | Validation     |       | Posterior |        |       |
|------------------------------------------------------|--------------------|----------|----------------|-------|-----------|--------|-------|
|                                                      | minimum            | maximum  | R <sup>2</sup> | RMSEP | 2.5%      | Median | 97.5% |
| LOG <sub>10</sub> (N <sub>ANC</sub> )                | 4.0                | 6.0 (lu) | 0.05           | 0.974 | 4.94      | 5.32   | 5.72  |
| LOG <sub>10</sub> (N <sub>RUB</sub> )                | 3.0                | 6.0 (lu) | 0.89           | 0.333 | 4.70      | 4.79   | 4.87  |
| LOG <sub>10</sub> (N <sub>TEX</sub> )                | 3.0                | 6.0 (lu) | 0.88           | 0.346 | 4.73      | 4.85   | 4.94  |
| LOG <sub>10</sub> (T <sub>SPLIT</sub> ) <sup>b</sup> | 5.0                | 7.0 (lu) | 0.01           | 0.997 | 5.49      | 6.23   | 6.74  |
| LOG <sub>10</sub> (T <sub>ISO</sub> ) <sup>b</sup>   | 3.0                | 7.0 (lu) | 0.81           | 0.438 | 4.27      | 4.53   | 4.72  |
| LOG <sub>10</sub> (T <sub>BOT</sub> ) <sup>b</sup>   | 5.0                | 7.0 (lu) | 0.02           | 0.990 | 5.14      | 5.19   | 5.32  |
| BOTSIZE                                              | 0.01               | 0.5 (u)  | 0.01           | 0.995 | 0.09      | 0.15   | 0.23  |
| M <sub>TEX&gt;&gt;RUB</sub>                          | 0.01               | 0.5 (u)  | 0.12           | 0.938 | 0.05      | 0.12   | 0.18  |
| M <sub>RUB&gt;&gt;TEX</sub>                          | 0.01               | 0.5 (u)  | 0.12           | 0.938 | 0.01      | 0.18   | 0.75  |

812 <sup>a</sup> priors are uniformly (u) or log-uniformly (lu) distributed and do not overlap zero for migration rates  
813 and bottleneck size.  
814 <sup>b</sup> the timing of demographic events is in (logarithm of) number of generation and both species have two  
815 generations annually.  
816

817 Table S4 and Table S5 show specific loci, values for population genetic statistics, and annotation, and are  
818 not included here for formative reasons, but are available upon request.  
819

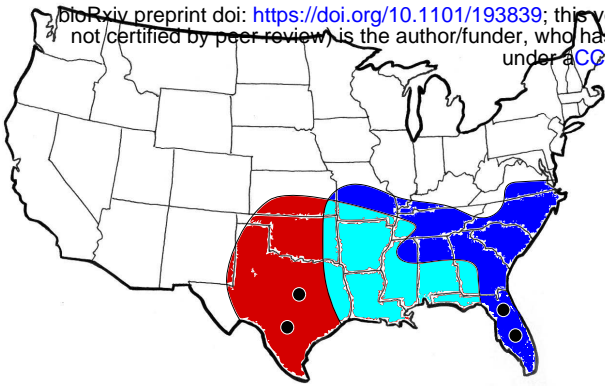

Fig.1. Geographic distributions for *G. texensis* (red) and *G. rubens* (blue). The sympatric zone is marked with turquoise. The distributions are approximate and based on the Singing Insects of North America data base (<http://entnemdept.ufl.edu/Walker/buzz/>). The black dots in Texas and Florida represent the sampling locations for *G. texensis* and *G. rubens*, respectively.

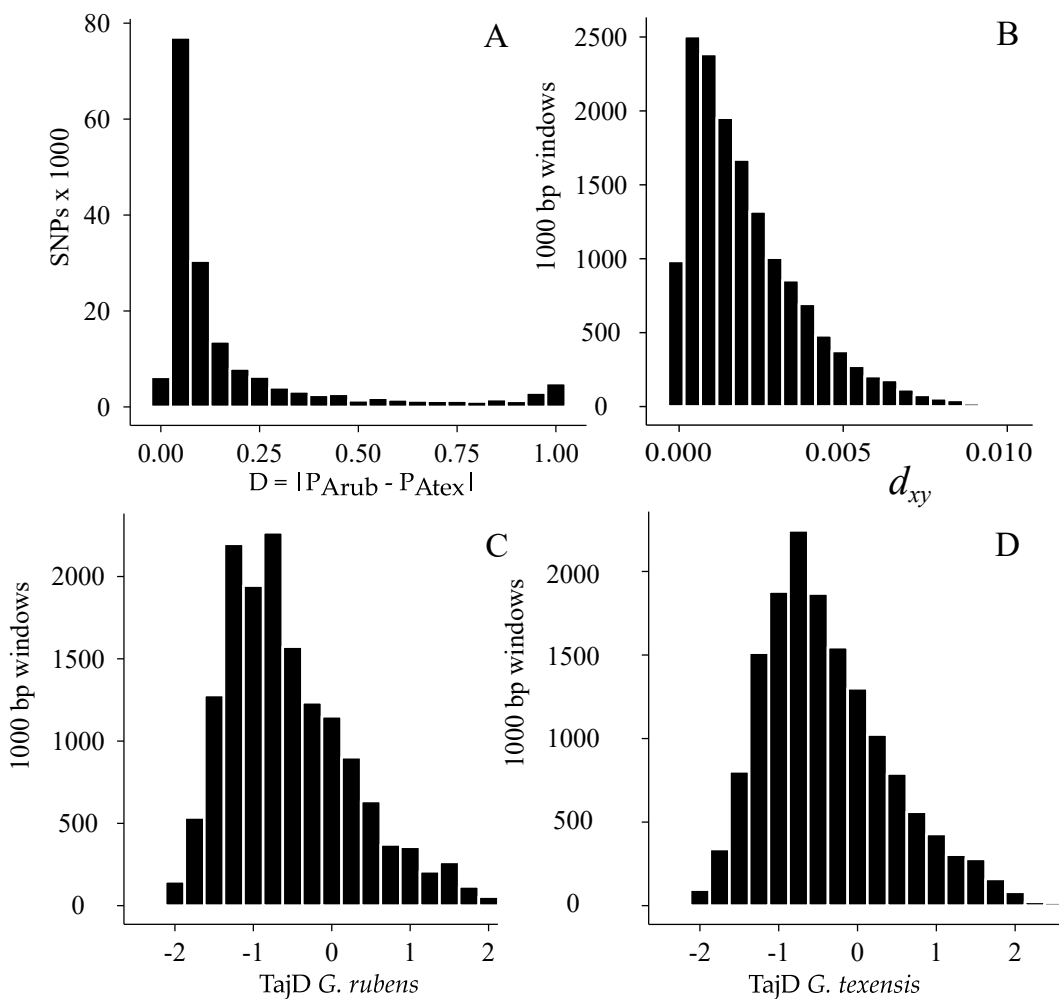

Fig. 2. Genomic divergence. The distribution of the interspecific allele frequency difference,  $D$ , across SNPs (A), of the absolute divergence,  $d_{xy}$ , in 1000 bp windows (B), and of Tajima's D in 1000 bp windows for *G. rubens* (C) and *G. texensis* (D), respectively



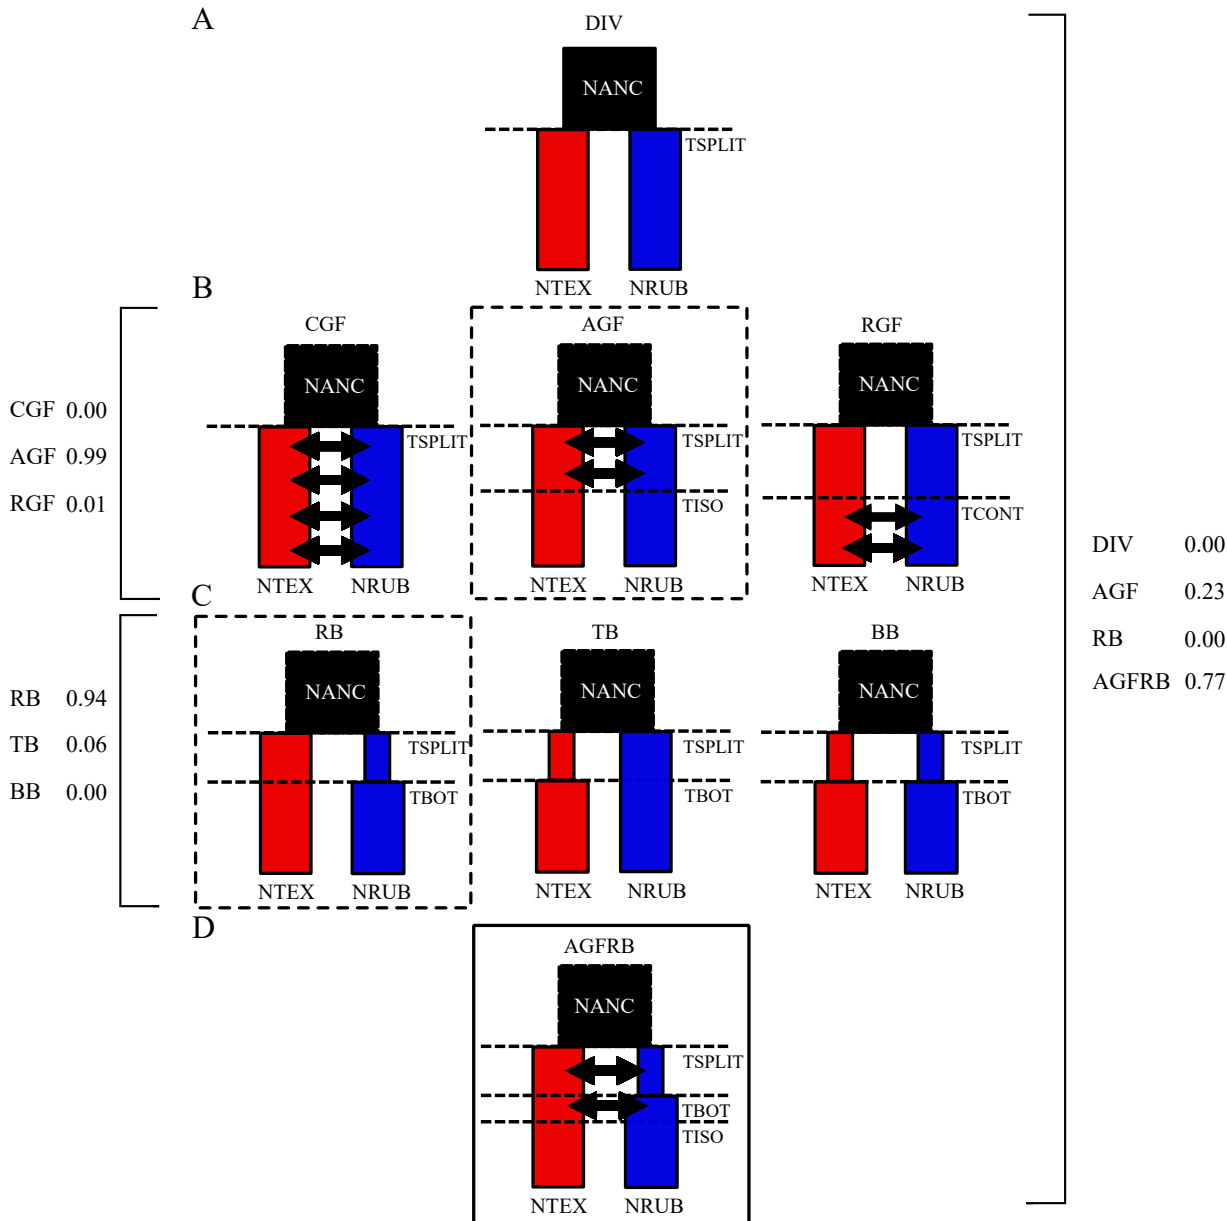

Fig3. Demographic scenarios for approximate Bayesian computation. Eight scenarios were simulated under the ABC framework. (A) A simple divergence scenario (DIV) with a log uniform prior on the divergence time ( $T_{\text{SPLIT}}$ ), the ancestral population size ( $N_{\text{ANC}}$ ) and the current effective population sizes for *G. rubens* and *G. texensis* ( $N_{\text{RUB}}$ ,  $N_{\text{TEX}}$ ). (B) Three different gene flow models with either continuous gene flow (CGF), ancestral gene flow (AGF), or recent gene flow (RGF) were additionally defined by parameters describing migration rates ( $M_{\text{TEX} \gg \text{RUB}}$ ,  $M_{\text{RUB} \gg \text{TEX}}$ ; uniform priors not overlapping zero) and the time point of cessation of gene flow ( $T_{\text{ISO}}$ ) or secondary contact ( $T_{\text{CONT}}$ ), both with log uniform priors. (C) Three bottleneck models defined by the time point of recovery to current population sizes ( $T_{\text{BOT}}$ ; log uniform prior) and the relative population size reduction (BOTSIZ; uniform prior not overlapping zero) for *G. rubens* (RB), *G. texensis* (TB), or both (BB). (D) An additional model (AGFRB) combining the best gene flow (AGF) and best bottleneck (RB) model, marked by the black, dashed rectangles. The posterior probabilities for model selection are given left of the square (opening) brackets for the three gene flow and the three bottleneck models, and right of the square (closing) brackets for the final model selection step.

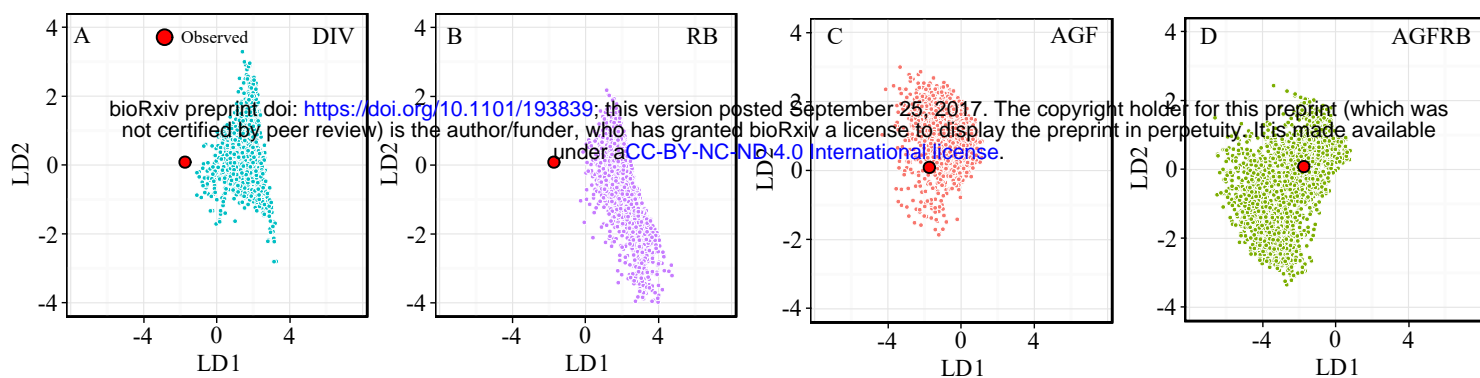

Fig4. Distribution of observed and simulated data sets in multivariate summary statistic space. For each of the four models used in the final model selection step (see also Fig 2) the distribution of the 1% posterior samples with the smallest Euclidean distance to the observed data is shown relative to the coordinates of the observed data. The multivariate summary statistic space is constrained by the first two linear discriminants (see text for details) representing linear combinations of the summary statistics used in model selection.

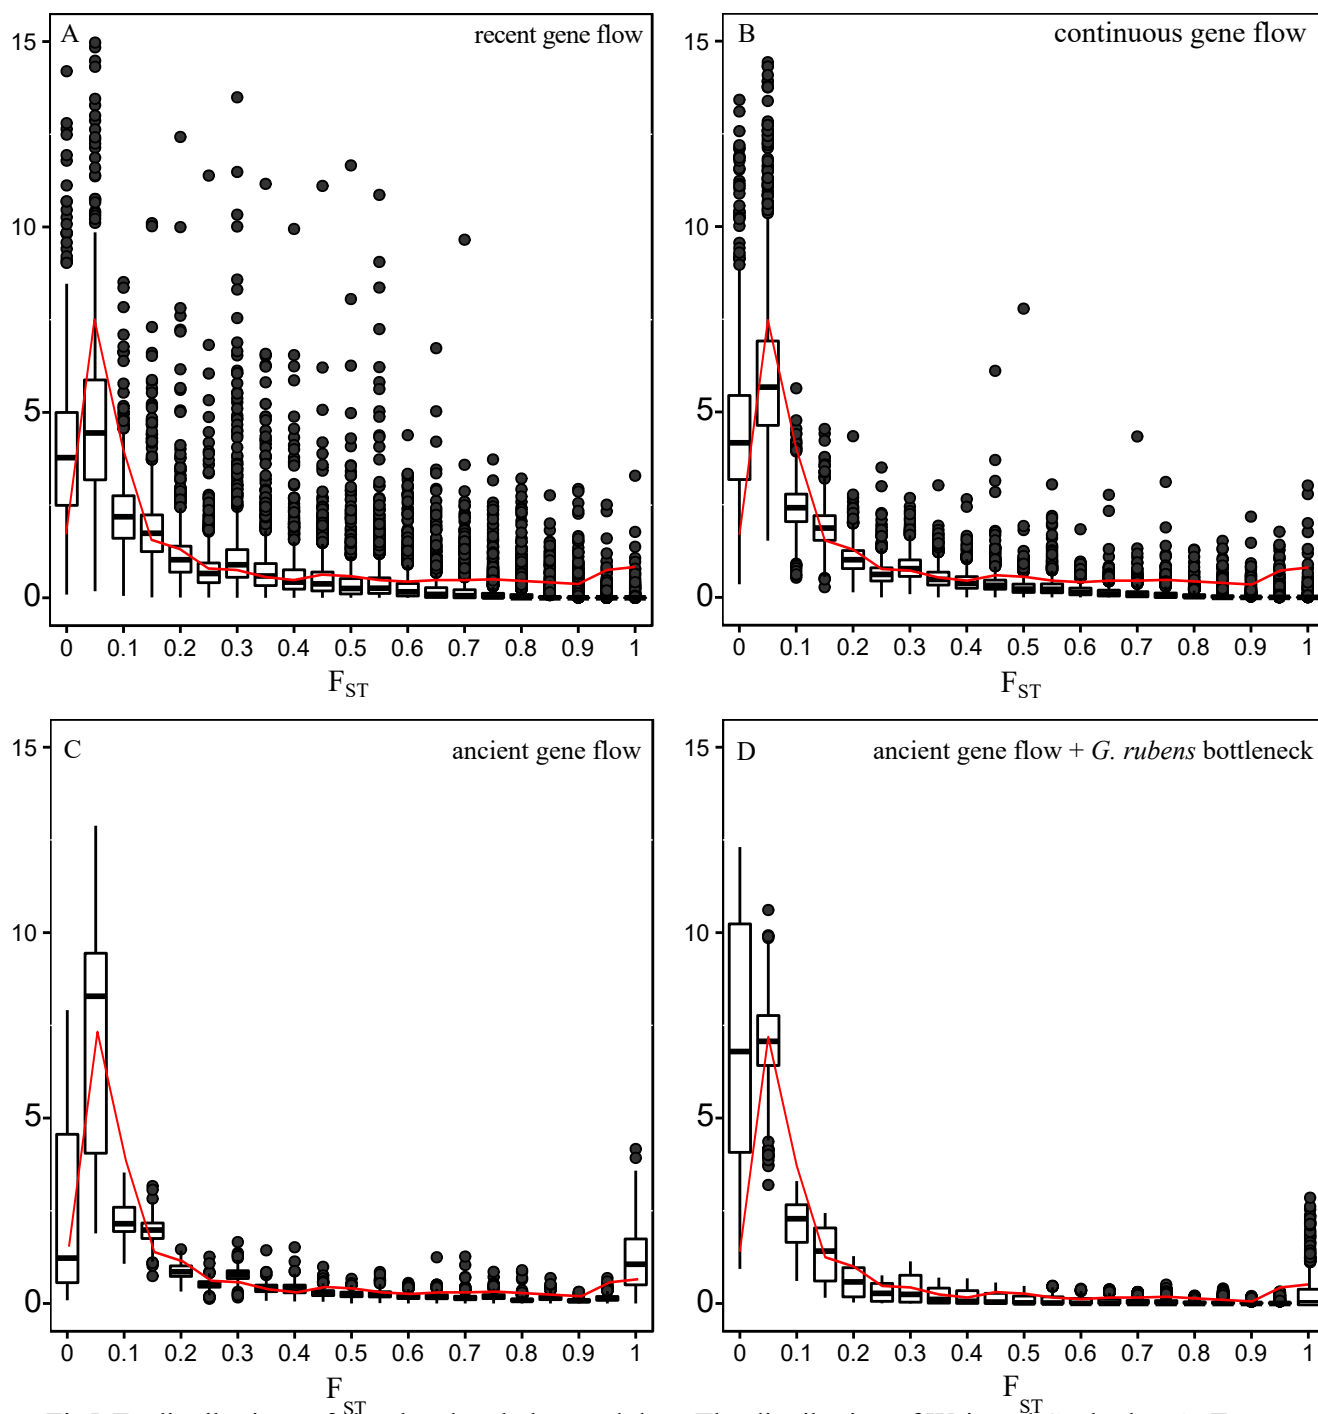

Fig5.  $F_{ST}$  distributions of simulated and observed data. The distribution of Weir and Cockerham's  $F_{ST}$  as calculated by the program arlsumstat are shown for 2000 simulated data sets under the ancestral gene flow and a bottleneck for *G. rubens* (AGFRB, box-and-whiskers top panel) scenario, the ancestral gene flow (AGF, box-and-whiskers bottom panel) scenario, and the observed data (1000 haplotype sequences, red solid line). The histograms show the density to enhance comparison between simulated and observed data.



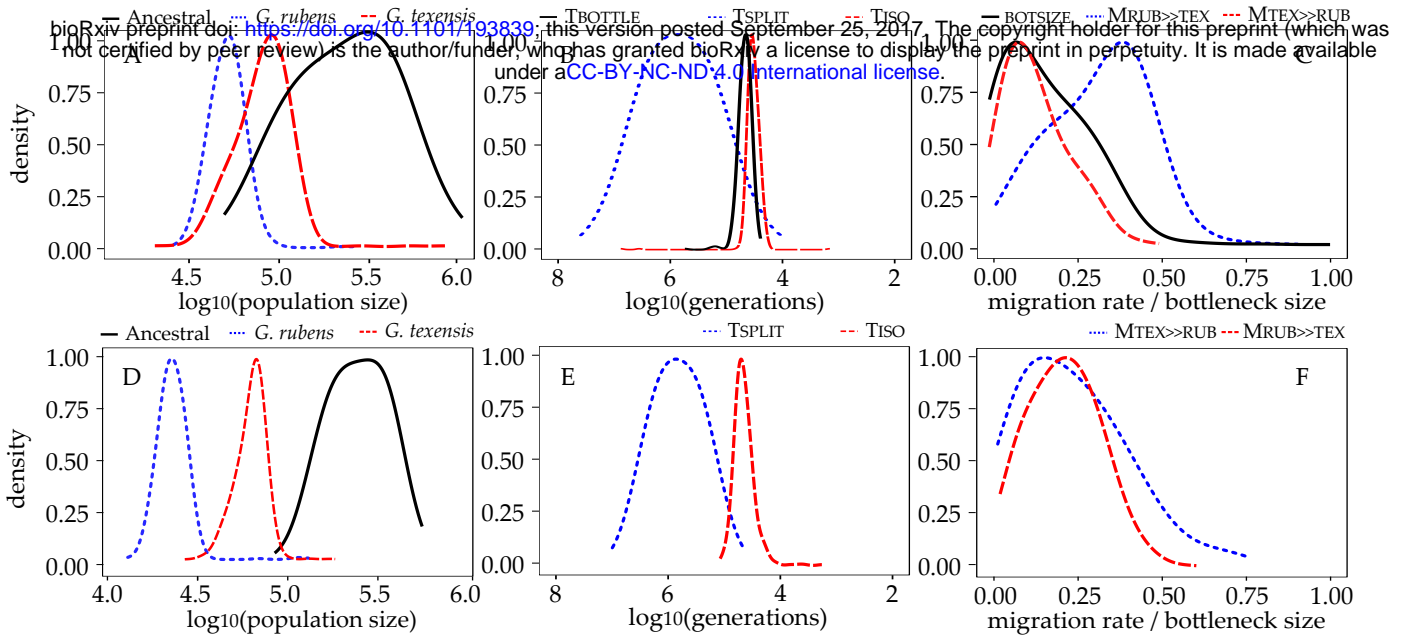

Fig6. Demographic parameter estimation. The density distribution under the AGFRB (A-C) and the AGF (D-F) are shown for the ancestral and current population sizes (A,D), the time point for divergence, cessation of gene flow, and recovery to current population sizes after the bottleneck (B,E), and the migration rates and bottleneck size (C,F). The density lines have been trimmed to the existent parameter distribution (i.e., no density extrapolation) and have been smoothed by adjusting the bandwidth. For lines within one panel the same smoothing bandwidth has been used.

Populations

bioRxiv preprint doi: <https://doi.org/10.1101/198829>; this version posted September 25, 2017. The copyright holder for this preprint (which was not certified by peer review) is the author/funder, who has granted bioRxiv a license to display the preprint in perpetuity. It is made available under aCC-BY-NC-ND 4.0 International license.

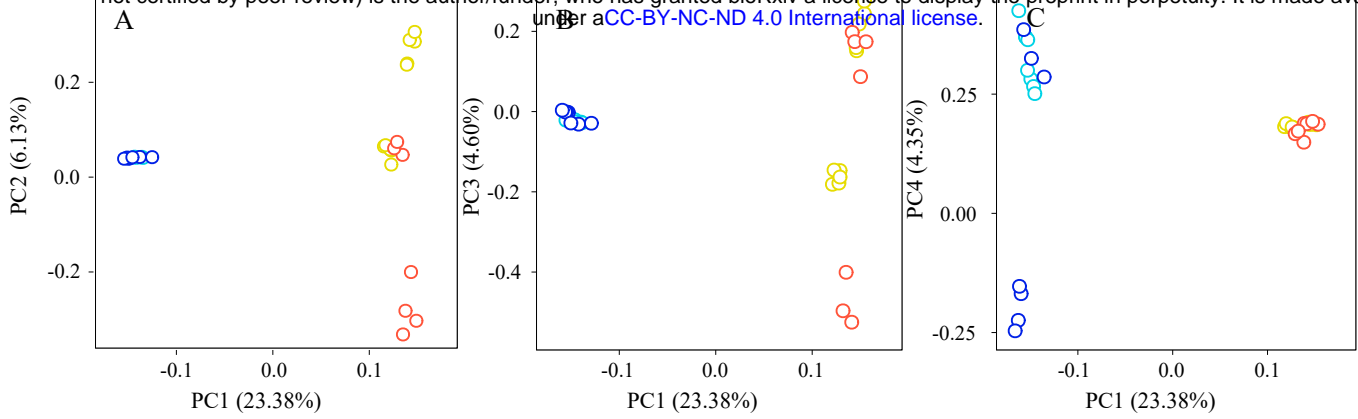

Fig S1. Population substructure in *G. rubens* and *G. texensis*. Variation in allele frequencies between species and between populations within species (Lake City and Ocala for *G. rubens*; Lancaster and Austin for *G. texensis*) is shown. The allele frequency variation in all 175,244 SNPs is summarized in the first four principal components teasing apart the species (PC1), and the populations in *G. texensis* (PC 2) and *G. rubens* (PC 4). Note that clustering along the PCs explaining within species variation among populations is much weaker compared to clustering of the species along PC1.

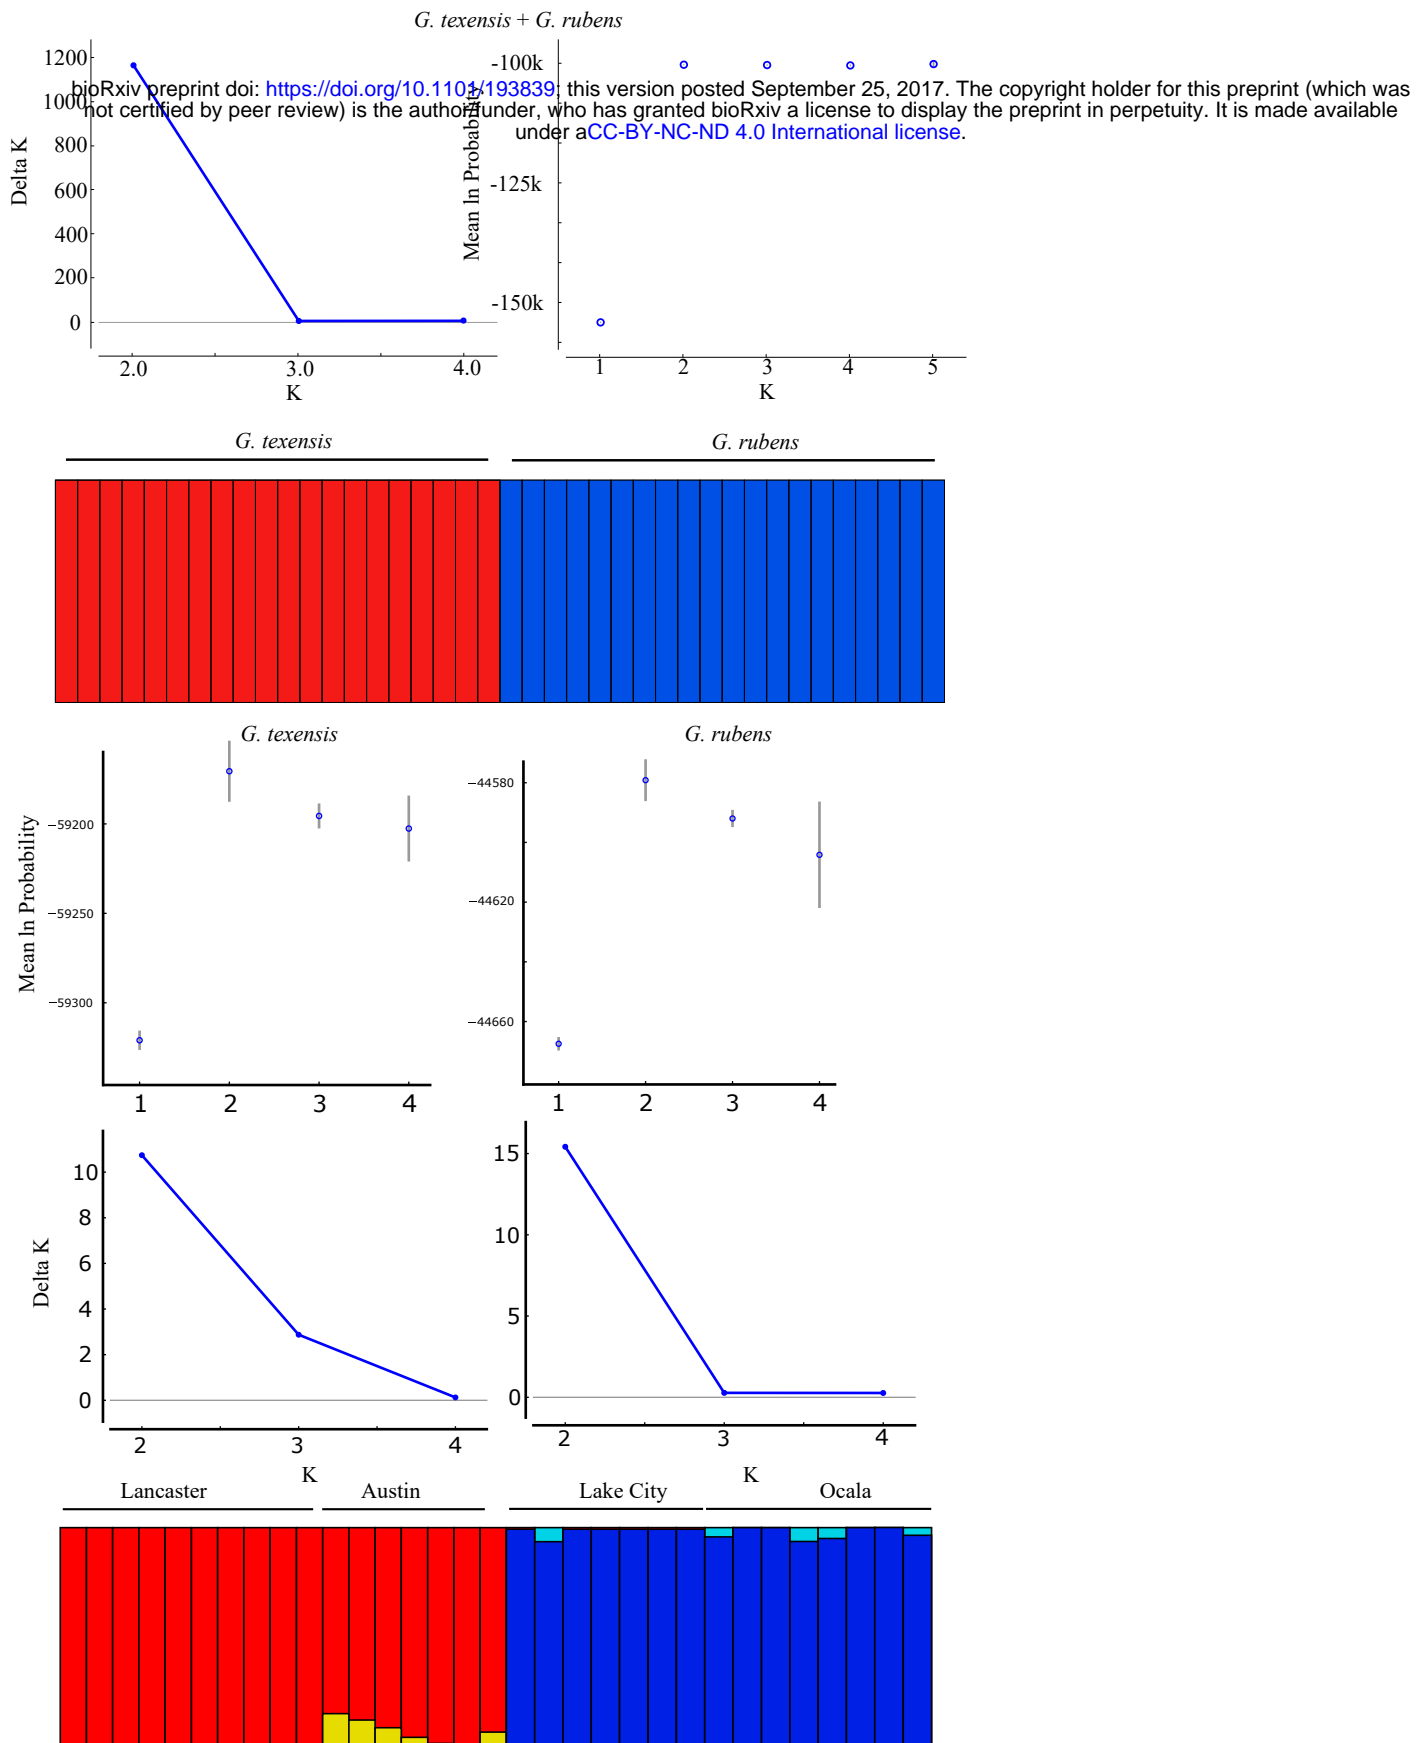

Fig S2.STRUCTURE results. For each of the species, STRUCTURE was run for 100,000 iterations at values for K=1 through K=4 (K=5 for the species combined). The mean natural logarithm of the probability and the delta K (increase or decrease in likelihood between consecutive runs for different values of K) were inspected to determine the most likely predicted number of populations. A run of *G. rubens* and *G. texensis* separately showed in both cases that, although the highest likelihood was for K=2, differences with K=1 were only marginal and a defined pattern in population substructure was absent (see also the bar plots at the bottom). The run for the species combined (K=2) shows no introgression of *G. texensis* genes into the *G. rubens* or vice versa.

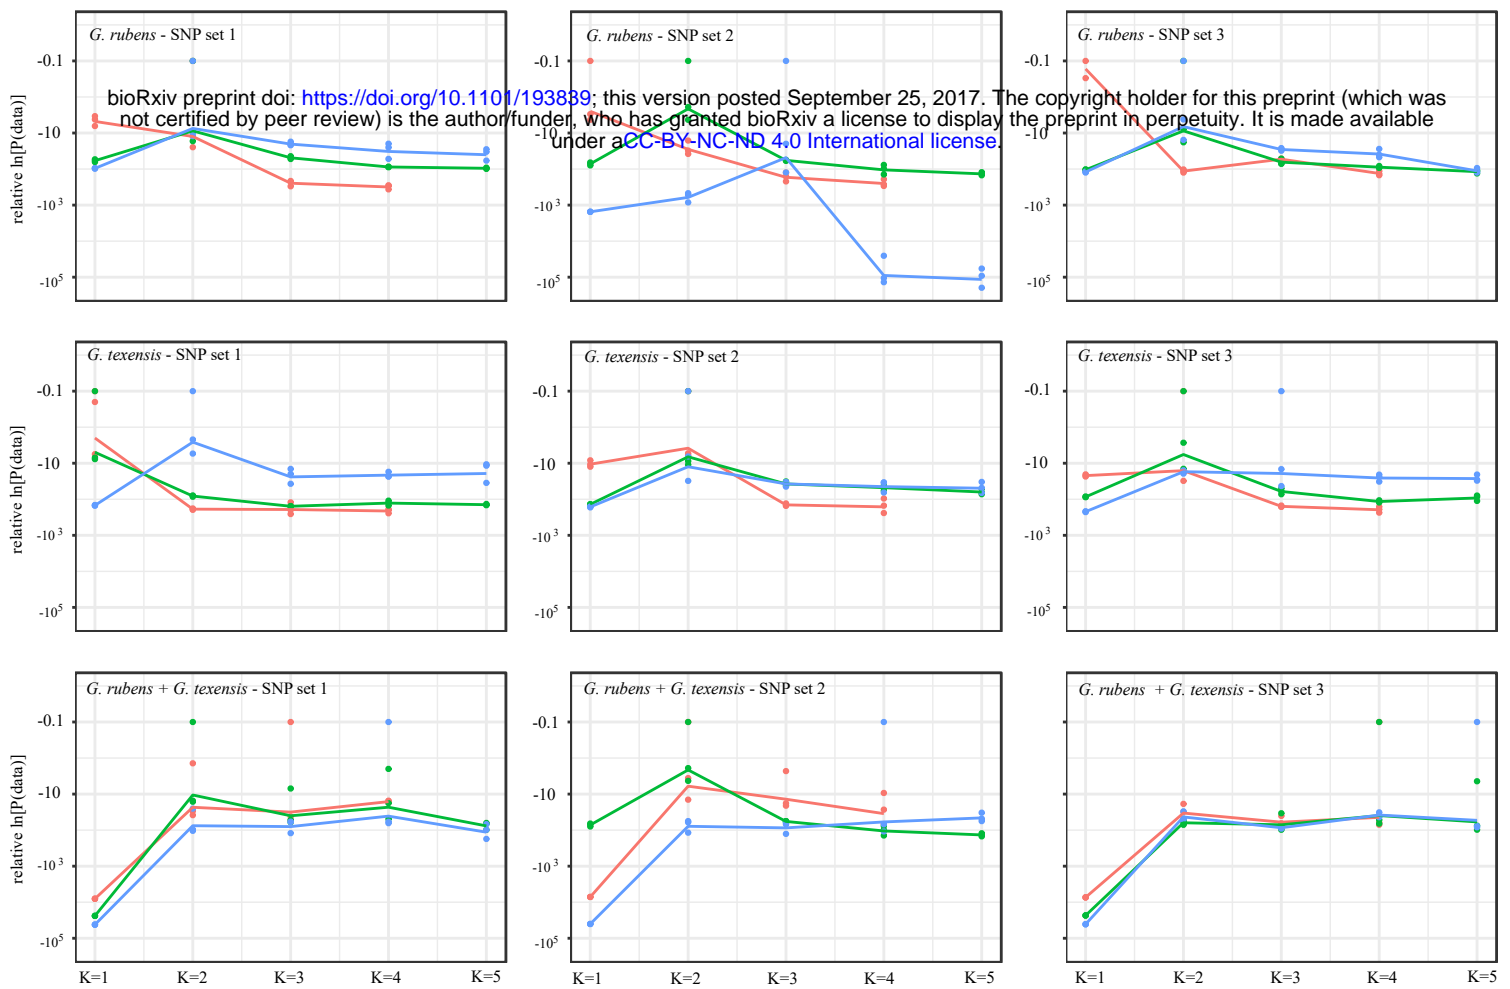

Figure S3. Relative natural log transformed probability of the data under different values for  $K$ . The raw probabilities from Structure relative to the maximum probability is shown for each  $K$ , for three random sets of 8835 SNPs (one per contig), and for *G. rubens*, *G. texensis*, and for the species combined (excluding seven individuals to correct for cryptic relatedness). Within each panel, the dots show each of the three iterations and the lines show the trend in the average difference in probability with the maximum probability for three different sample sizes: two random individuals per population (red), five random individuals per population (green), and all the individuals sampled from the populations.

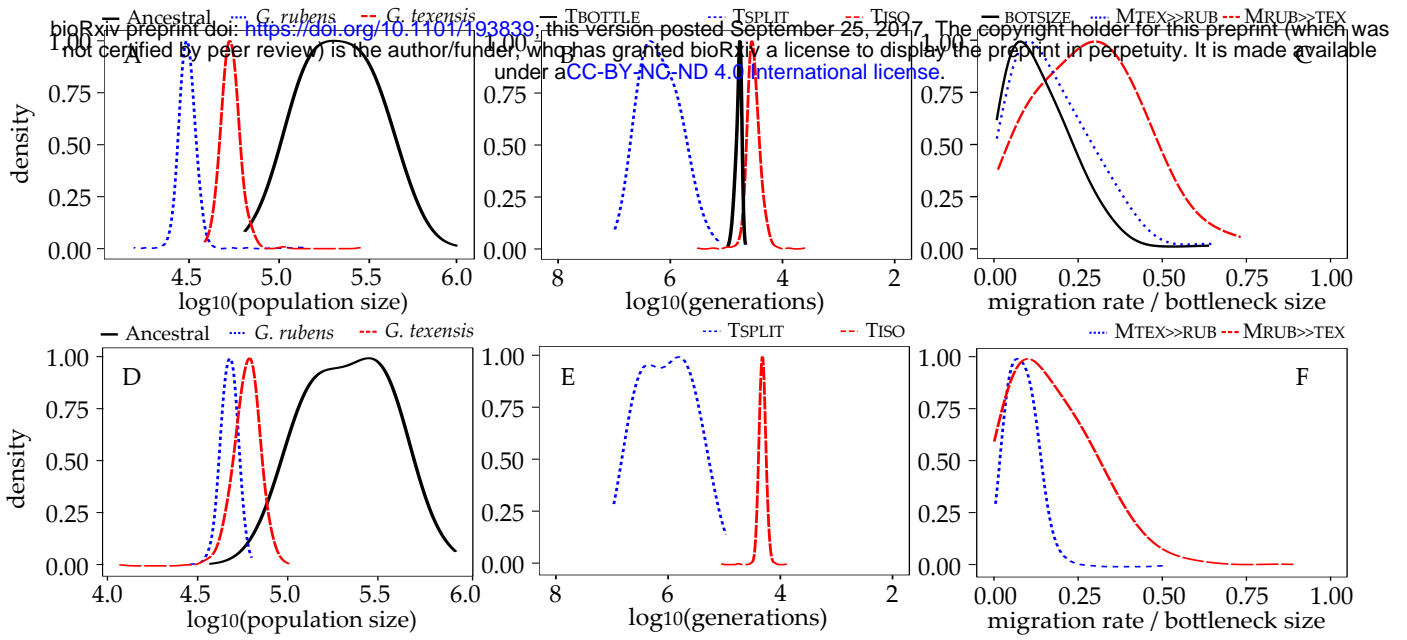

Fig S4. Demographic parameter estimation. The density distribution under the AGFRB (A-C) and the AGF (D-F) are shown for the ancestral and current population sizes (A,D), the time point for divergence, cessation of gene flow, and recovery to current population sizes after the bottleneck (B,E), and the migration rates and bottleneck size (C,F). The density lines have been trimmed to the existent parameter distribution (i.e., no density extrapolation) and have been smoothed by adjusting the bandwidth. For lines within one panel the same smoothing bandwidth has been used.
